# Supplementary material for: A bis(triazole)benzamide receptor for the complexation of halide anions and neutral carboxylic acid guests. Guest-controlled topicity and self-assembly
Source: Royal Society of Chemistry journal article supplement (doi:10.1039/c2ob26797g), 2012-11-26
Supplement: c2ob26797g.pdf [file c2ob26797g.pdf]

## Supporting Information

### A bis(triazole)benzamide receptor for the complexation of halide anions and neutral carboxylic acid guests. Guest-controlled topicity and self-assembly

Fátima García<sup>a</sup> Juan Aragón,<sup>b</sup> Rafael Viruela,<sup>b</sup> Enrique Orti<sup>b\*</sup> Luis Sánchez<sup>a\*</sup>

<sup>a</sup> Departamento de Química Orgánica, Facultad de Ciencias Químicas, Universidad Complutense, E-28040 Madrid (Spain); e-mail: [lusamar@quim.ucm.es](mailto:lusamar@quim.ucm.es)

<sup>b</sup> Instituto de Ciencia Molecular, Universidad de Valencia, E-46980 Paterna (Spain); e-mail: [enrique.orti@uv.es](mailto:enrique.orti@uv.es)

#### Contents:

|                                                                             |      |
|-----------------------------------------------------------------------------|------|
| 1.- Supplementary Figures                                                   | S-2  |
| NOE experiments of compound <b>1</b>                                        | S-2  |
| Concentration dependent NMR                                                 | S-2  |
| Titration experiments of compound <b>1</b> with halide anions               | S-3  |
| Computed molecular electrostatic potential of conformation A                | S-5  |
| Optimized structures of complexes <b>1•12GA-l</b> and <b>1•12GA-r</b>       | S-5  |
| Titration experiments of compound <b>1</b> with carboxylic acid <b>12GA</b> | S-5  |
| SEM Images                                                                  | S-6  |
| 2. Experimental Section                                                     | S-7  |
| 3. Collection of spectra                                                    | S-8  |
| 4. Calculated atom coordinates and absolute energies                        | S-15 |

## 1. Supplementary Figures

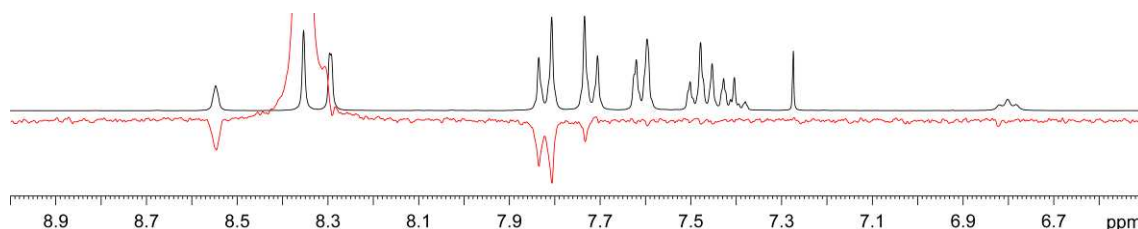

**Figure S1.** Partial  $^1\text{H}$  NMR spectra ( $\text{CDCl}_3$ , 300 MHz, 298 K) (black) and NOE experiments (red) of **1** in  $\text{CDCl}_3$  at 50 mM.

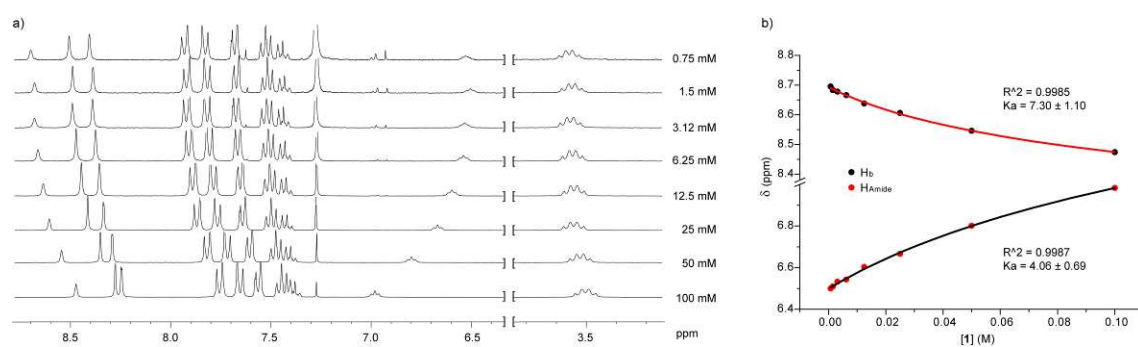

**Figure S2.** (a) Partial  $^1\text{H}$  NMR spectra at different concentrations of receptor **1** ( $\text{CDCl}_3$ , 300 MHz, 298 K). (b) Concentration dependence of the chemical shift corresponding to the proton in the 1,2,3-triazole ring ( $\text{H}_b$  in Scheme 1) and to the amide proton, and fit to the isodesmic model.

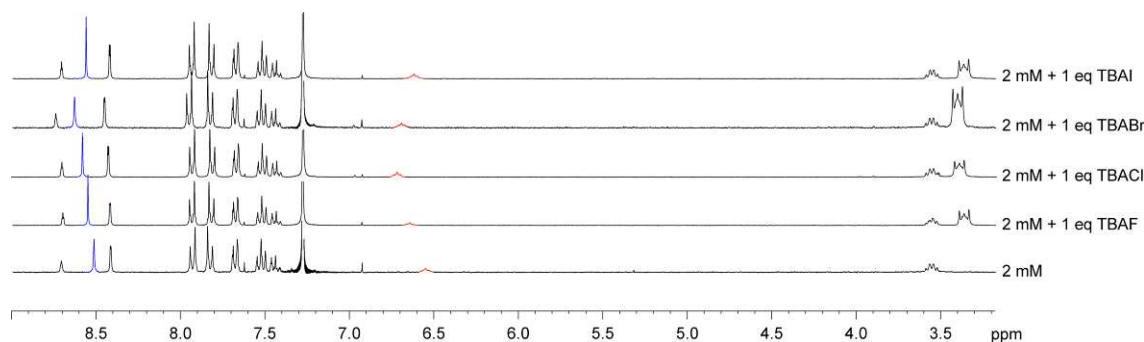

**Figure S3.** Partial  $^1\text{H}$  NMR spectra (300 MHz, 298 K, 2 mM,  $\text{CDCl}_3$ ) of aryl triazole **1** upon titrational addition of tetrabutylammonium salts of  $\text{F}^-$ ,  $\text{Cl}^-$ ,  $\text{Br}^-$ , and  $\text{I}^-$ .

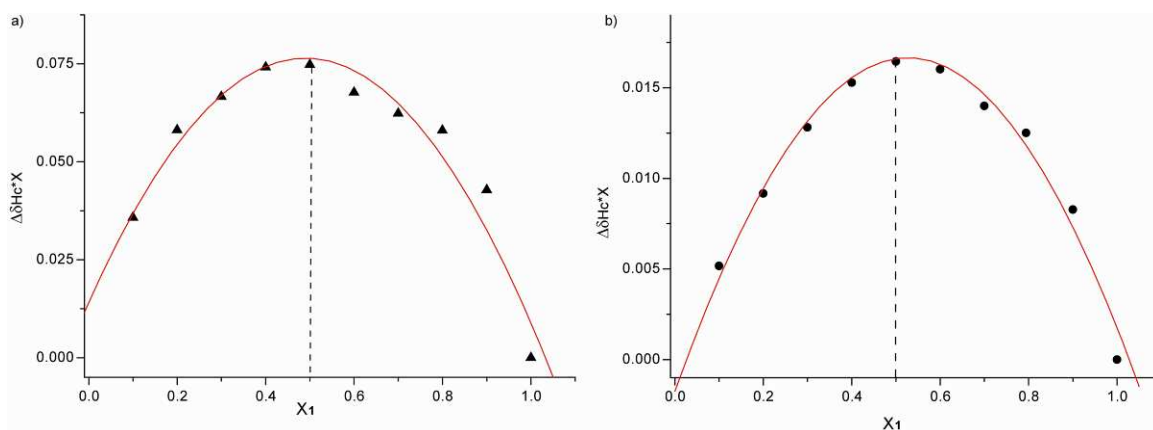

**Figure S4.** Job plot showing the 1:1 stoichiometry of the complex formed by **1** and TBACl (a) and **1** and TBABr (b) in  $\text{CDCl}_3$  at a total concentration of 3 mM.

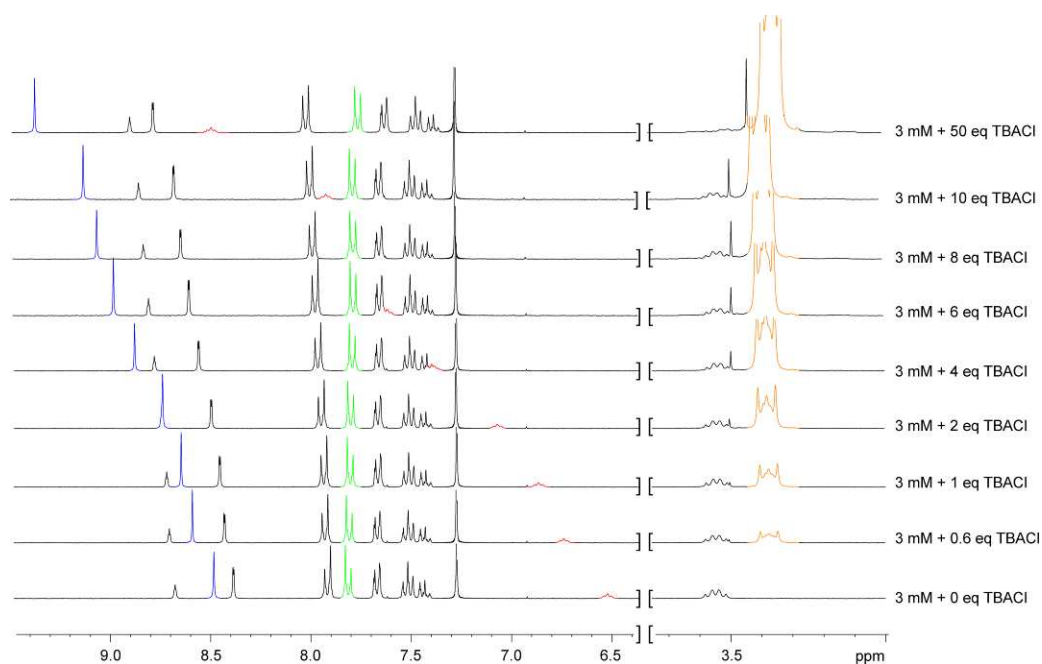

**Figure S5.** Partial  $^1\text{H}$  NMR spectra (300 MHz, 298 K, 3 mM,  $\text{CDCl}_3$ ) of aryl triazole **1** upon titration addition of TBACl.

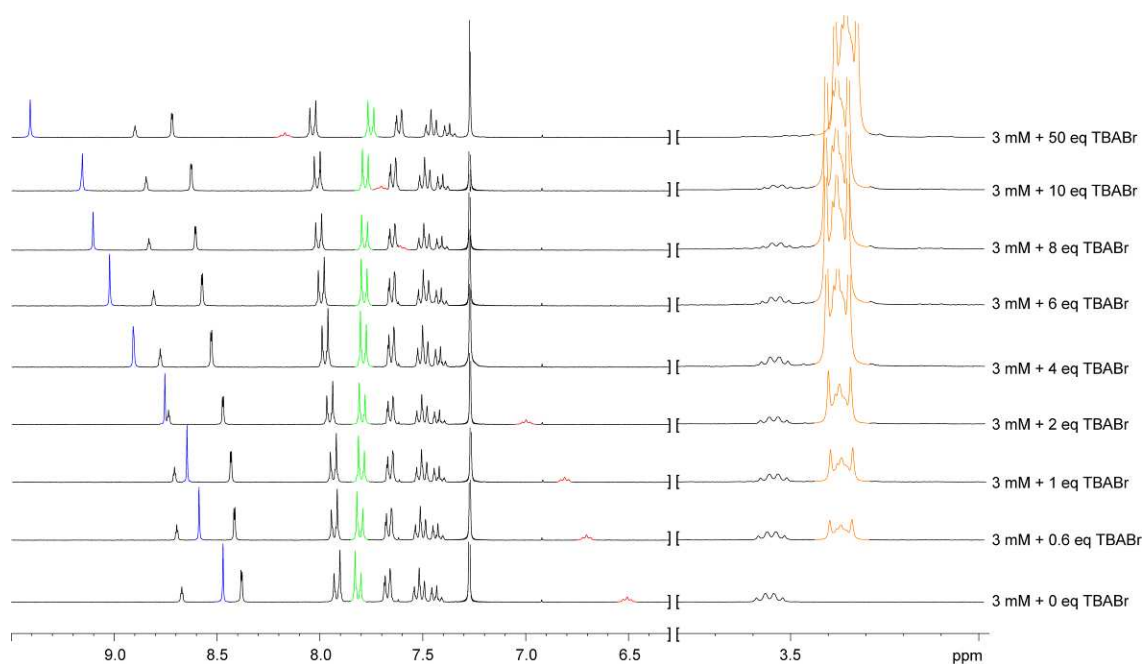

**Figure S6.** Partial  $^1\text{H}$  NMR spectra (300 MHz, 298 K, 3 mM,  $\text{CDCl}_3$ ) of aryl triazole **1** upon titrational addition of TBABr.

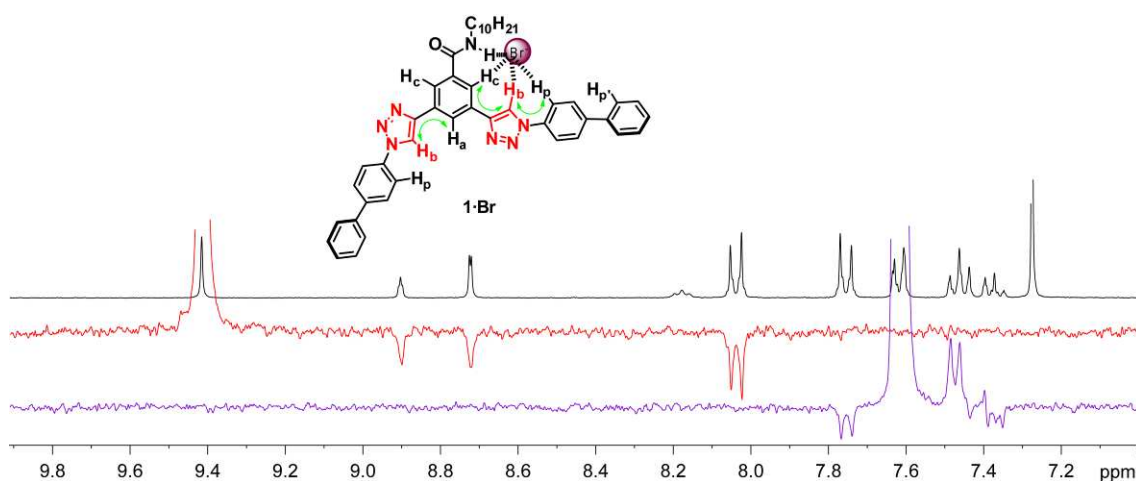

**Figure S7.** Partial  $^1\text{H}$  NMR spectra (300 MHz, 298 K) (black) and NOE experiments (red and violet) of aryl triazole **1** in  $\text{CDCl}_3$  at 3 mM upon addition of TBABr. The NOE contacts are represented by curved green arrows in the drawing of the chemical formula.

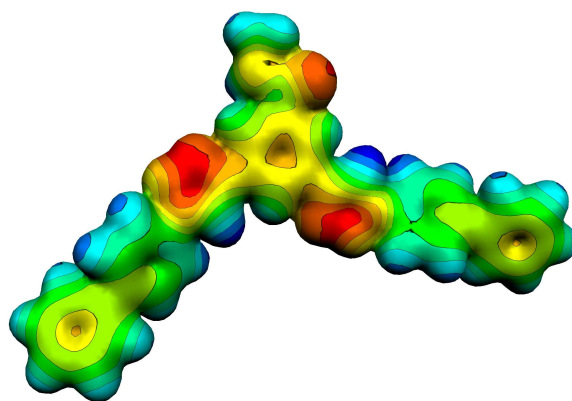

**Figure S8.** M06-2X/6-311G\*\* molecular electrostatic potential calculated for receptor **1** in conformation A (red and blue are negative and positive potentials, respectively).

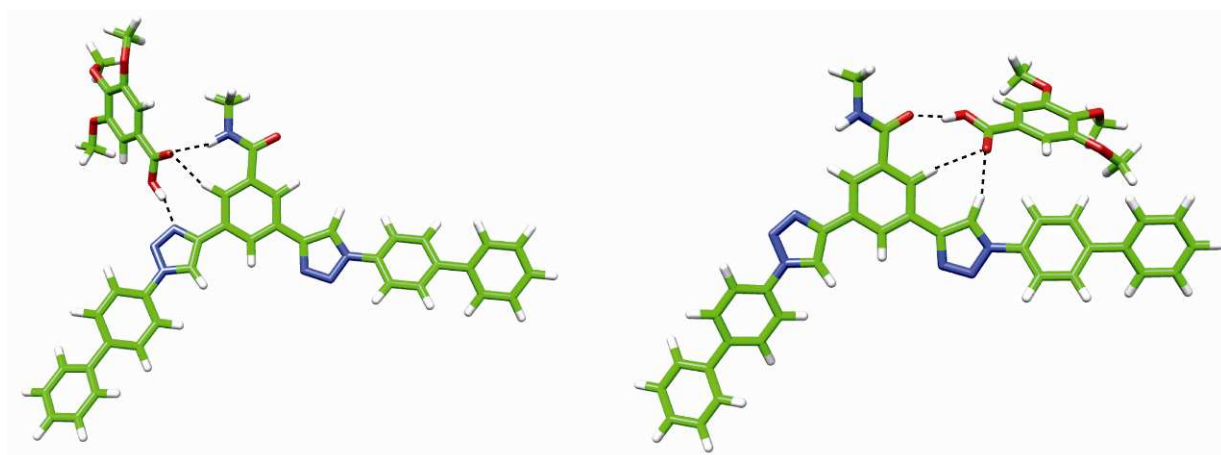

**Figure S9.** Minimum-energy structures calculated for complexes **1•12GA-l** and **1•12GA-r** at the M06-2X/6-311G\*\* level.

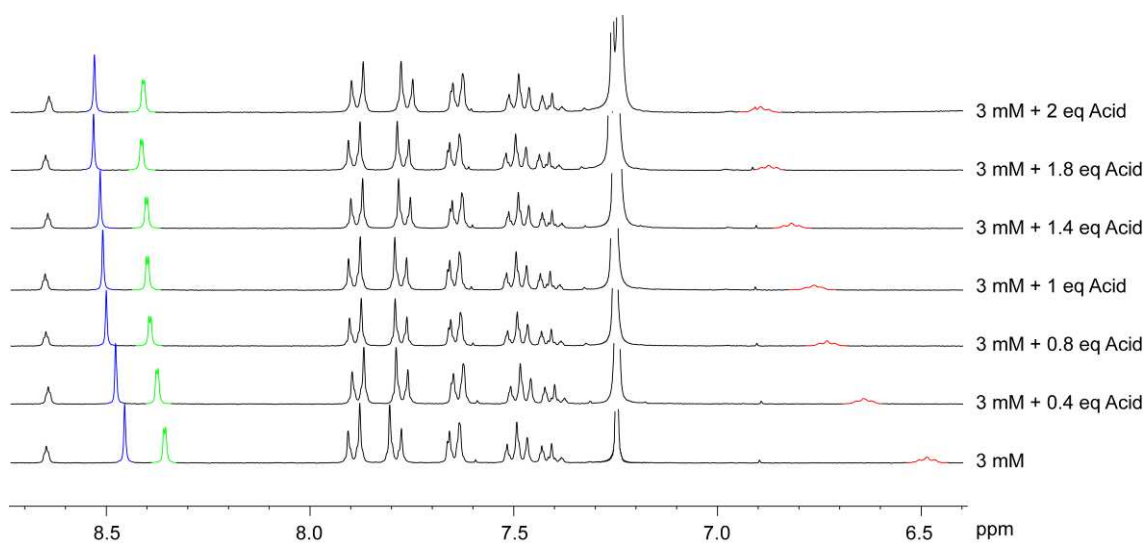

**Figure S10.** Partial  $^1\text{H}$  NMR spectra (300 MHz, 298 K, 3 mM,  $\text{CDCl}_3$ ) of aryl triazole **1** upon titration addition of **12GA**.



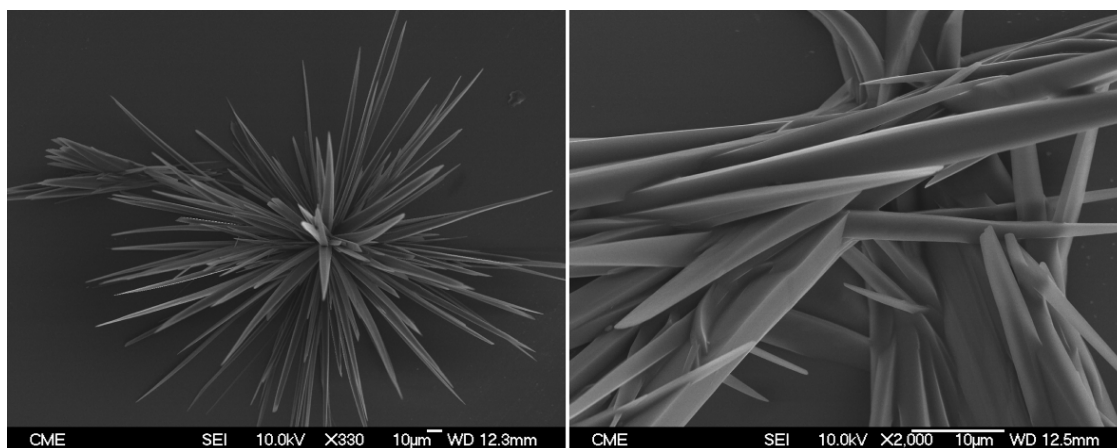

**Figure S11.** SEM images (298 K,  $1 \times 10^{-4}$  M in chloroform/acetonitrile, glass substrate) of the needle-like objects formed from **1**.

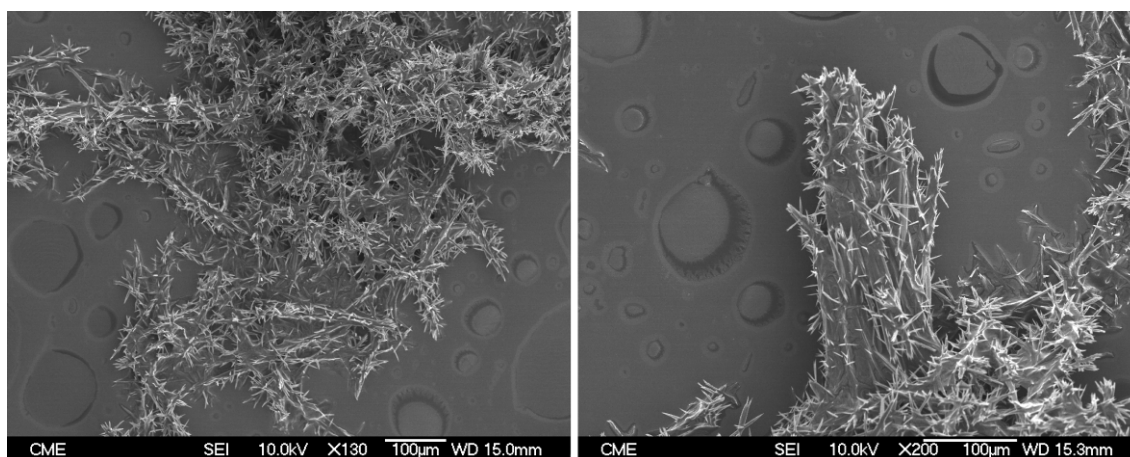

**Figure S12.** SEM images (298 K,  $1 \times 10^{-4}$  M in chloroform/acetonitrile, glass substrate) of the prickly-like objects formed from complex **1**•Br<sup>-</sup> TBA<sup>+</sup>.

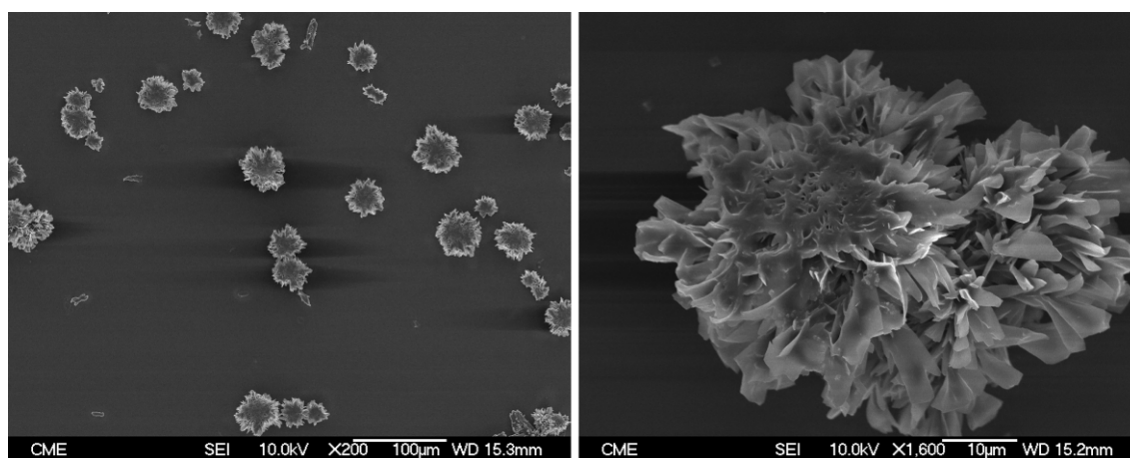

**Figure S13.** SEM images (298 K,  $1 \times 10^{-4}$  M in chloroform/acetonitrile, glass substrate) of the objects formed from complex **1**•(12GA)<sub>2</sub>.

## 2. Experimental Section

**General.** All solvents were dried according to standard procedures. Reagents were used as purchased. All air-sensitive reactions were carried out under argon atmosphere. Flash chromatography was performed using silica gel (Merck, Kieselgel 60, 230-240 mesh or Scharlau 60, 230–240 mesh). Analytical thin layer chromatography (TLC) was performed using aluminum coated Merck Kieselgel 60 F254 plates. NMR spectra were recorded on a Bruker Avance 300 ( $^1\text{H}$ : 300 MHz;  $^{13}\text{C}$ : 75 MHz) spectrometer at 298 K using partially deuterated solvents as internal standards. Coupling constants ( $J$ ) are denoted in Hz and chemical shifts ( $\delta$ ) in ppm. Multiplicities are denoted as follows: s = singlet, d = doublet, t = triplet, m = multiplet, br = broad. FT-IR spectra were recorded on a Bruker Tensor 27 (ATR device) spectrometer. UV-Vis spectra were recorded on a Varian Cary 50 spectrophotometer. High resolution mass spectra (HRMS) were recorded on a FTMS Bruker APEX Q IV spectrometer (high resolution TOF). SEM images were obtained from on a JEOL JSM 6335F microscope working at 10kV. For the preparation of the samples for SEM imaging, a vial containing a solution of the compound 1 or the mixture of compound 1 and tetrabutylammonium bromide or 3,4,5-tri(dodecyloxy)gallic acid (1:1 or 1:2 respectively) in chloroform ( $1 \times 10^{-4}$  M) was introduced in a bigger recipient containing acetonitrile. The slow diffusion of acetonitrile vapours into the chloroform solutions results in the precipitation of a yellowish solid that is deposited onto a glass substrate and the remaining solvent was slowly evaporated. For the titration experiments, the solution of receptor 1 in  $\text{CDCl}_3$  at 298 K was titrated by adding known aliquots of concentrated solutions of the corresponding tetrabutylammonium salts of each halide or the gallic acid derivative. The guest solutions used to effect the titration contained the receptors at the same concentration as the receptor solution into which they were being titrated so as to obviate the need to account for dilution effects during the titrations.

### 3. Collection of spectra

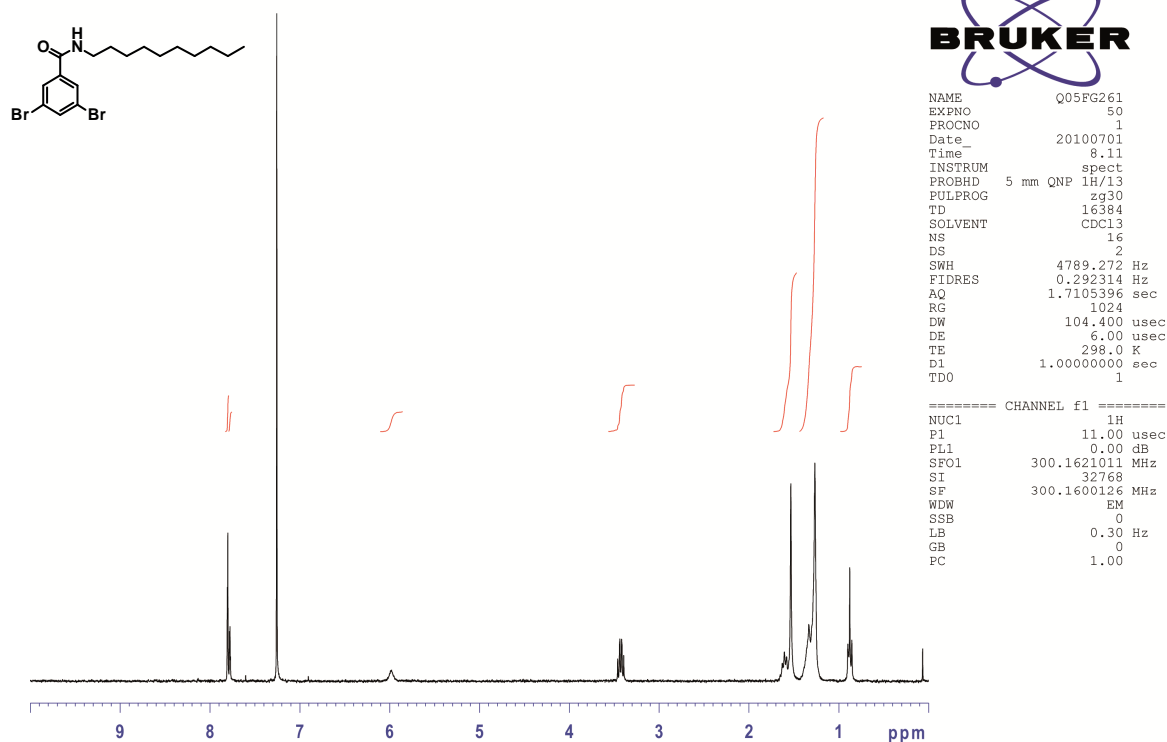

$^1\text{H}$  NMR ( $\text{CDCl}_3$ , 300 MHz, 298 K) of compound **3**.

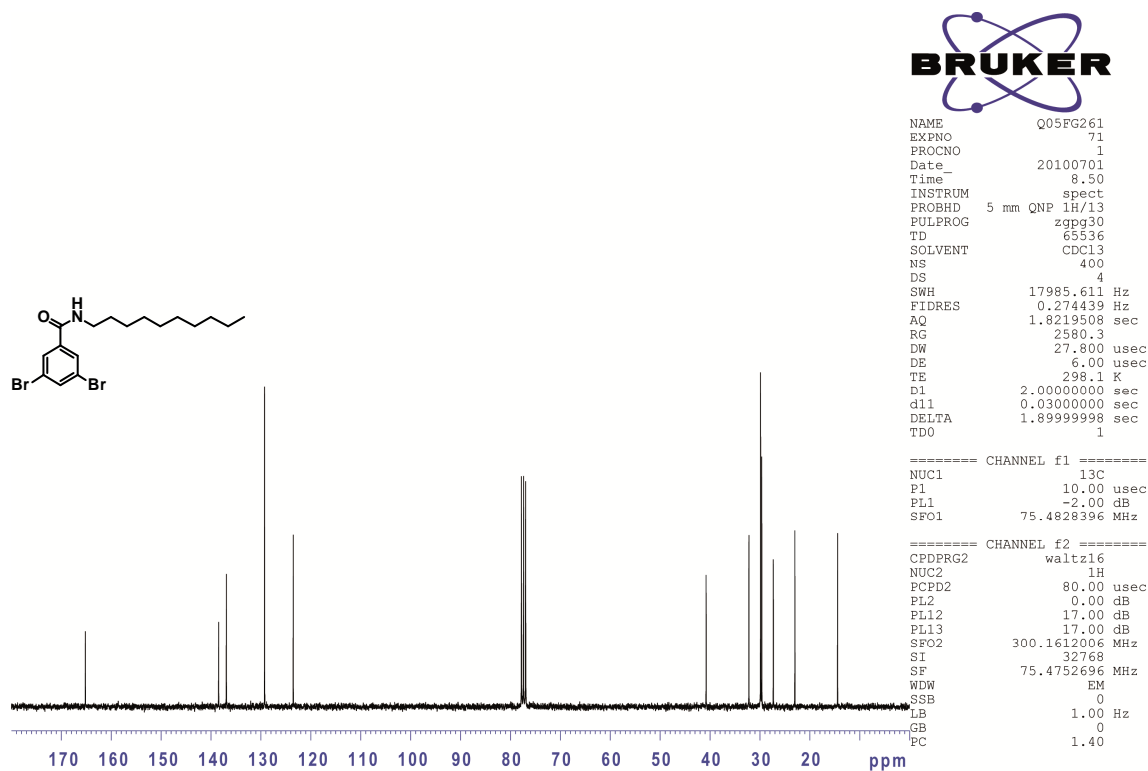

$^{13}\text{C}$  NMR ( $\text{CDCl}_3$ , 75 MHz, 298 K) of compound **3**.



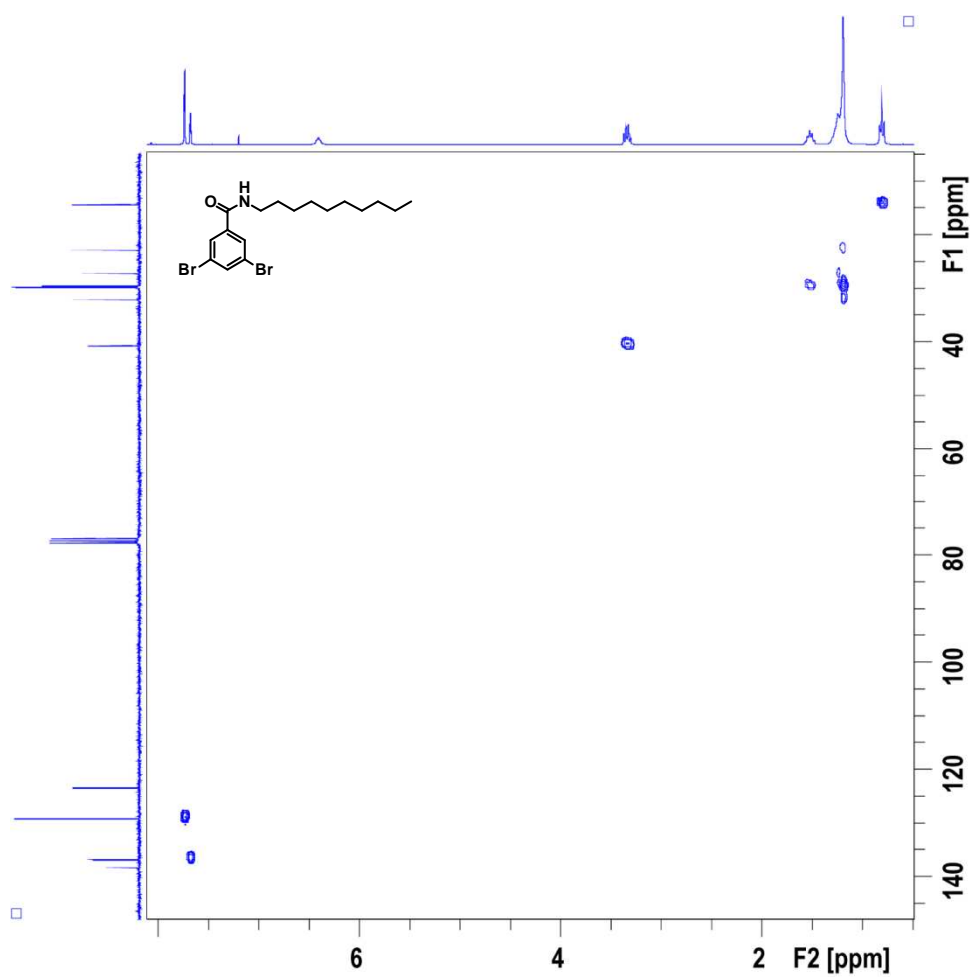

$^1\text{H}$ ,  $^{13}\text{C}$ -HMQC spectrum ( $\text{CDCl}_3$ , 298 K) of compound 3.

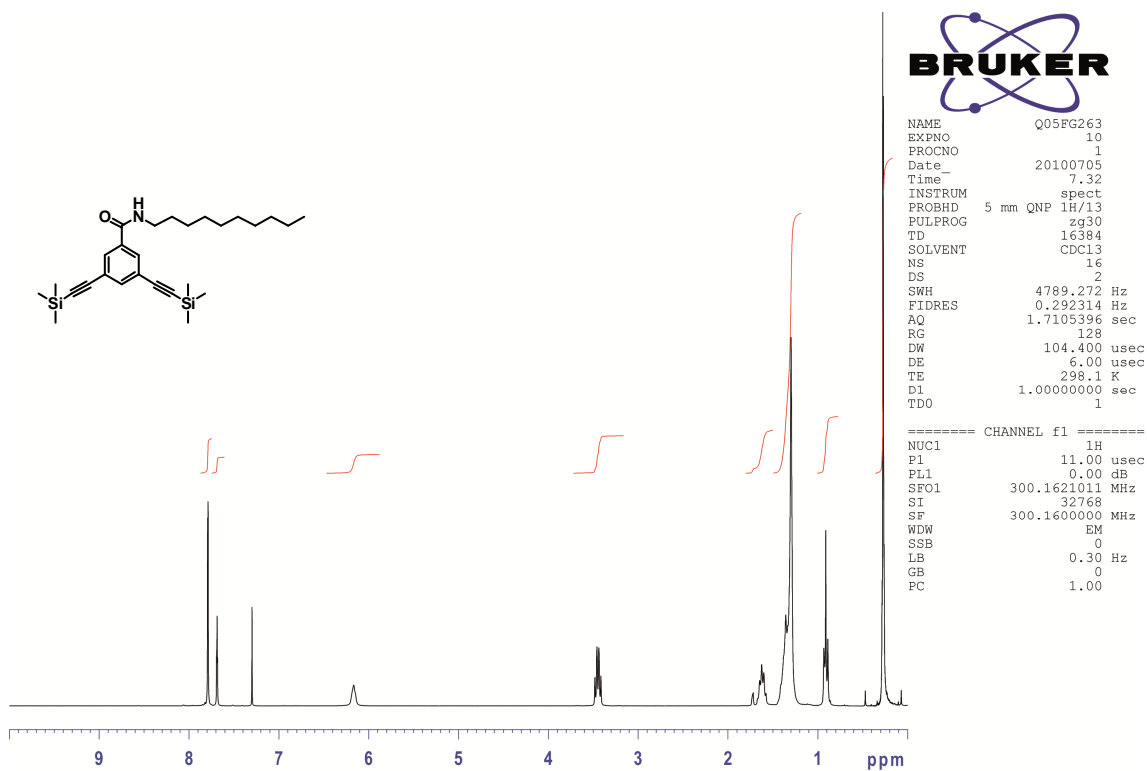

<sup>1</sup>H NMR (CDCl<sub>3</sub>, 300 MHz, 298 K) of compound 4.

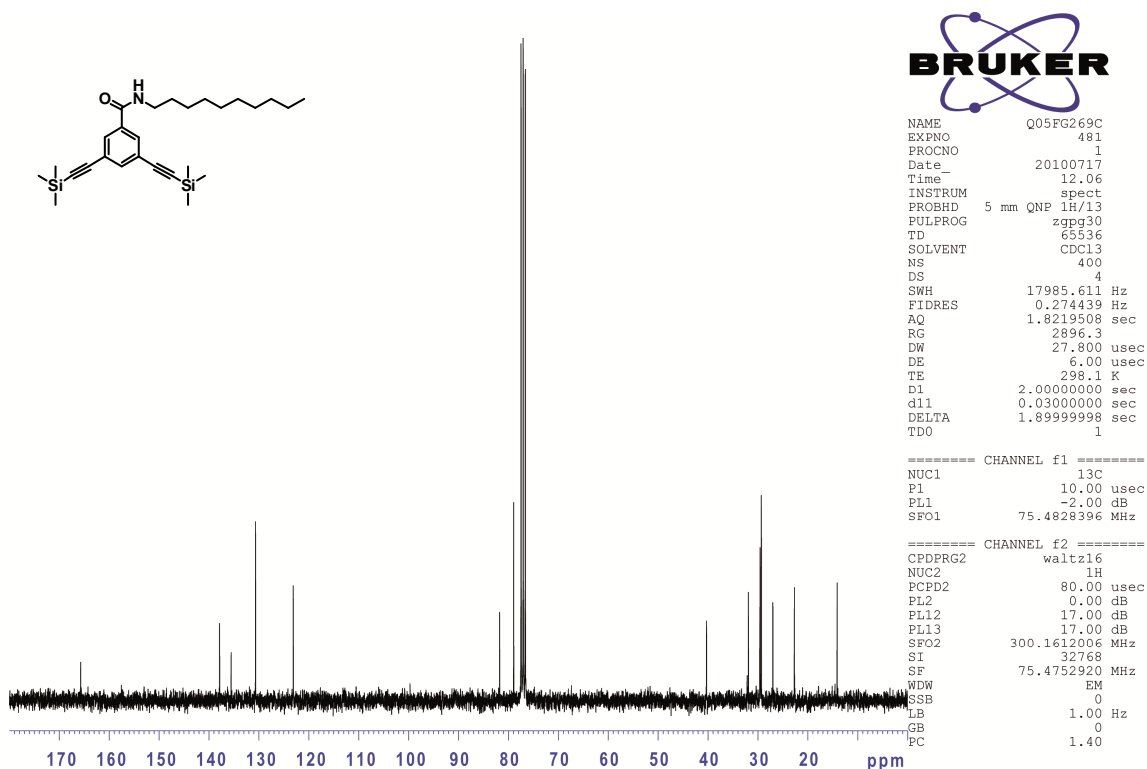

<sup>13</sup>C NMR (CDCl<sub>3</sub>, 75 MHz, 298 K) of compound 4.

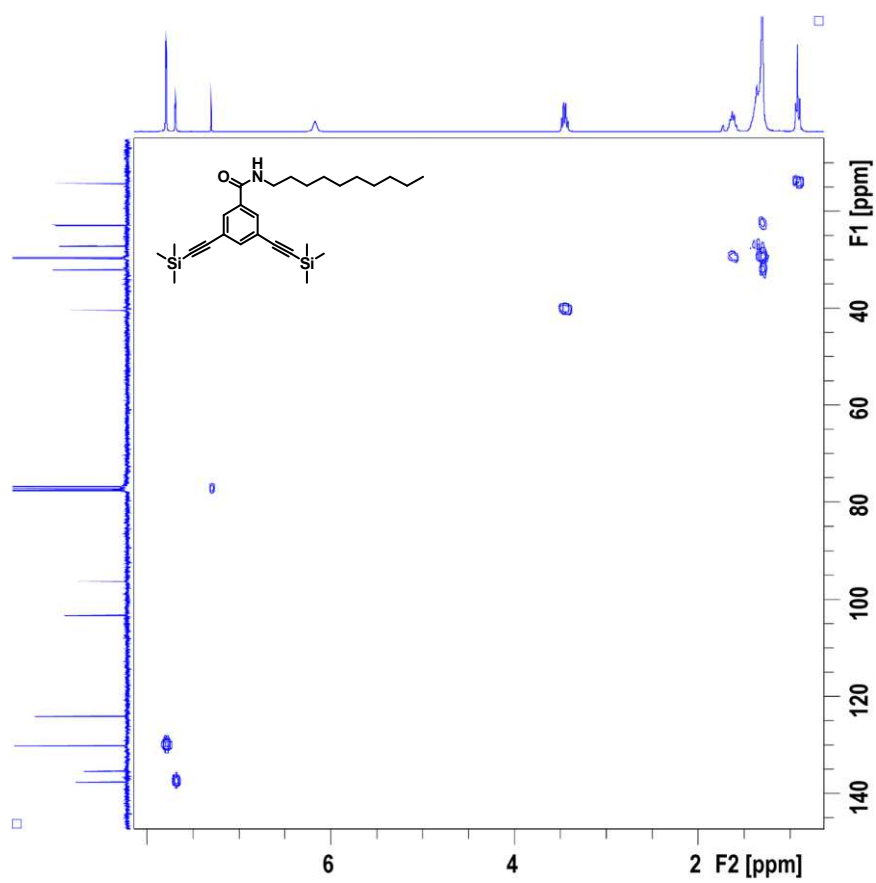

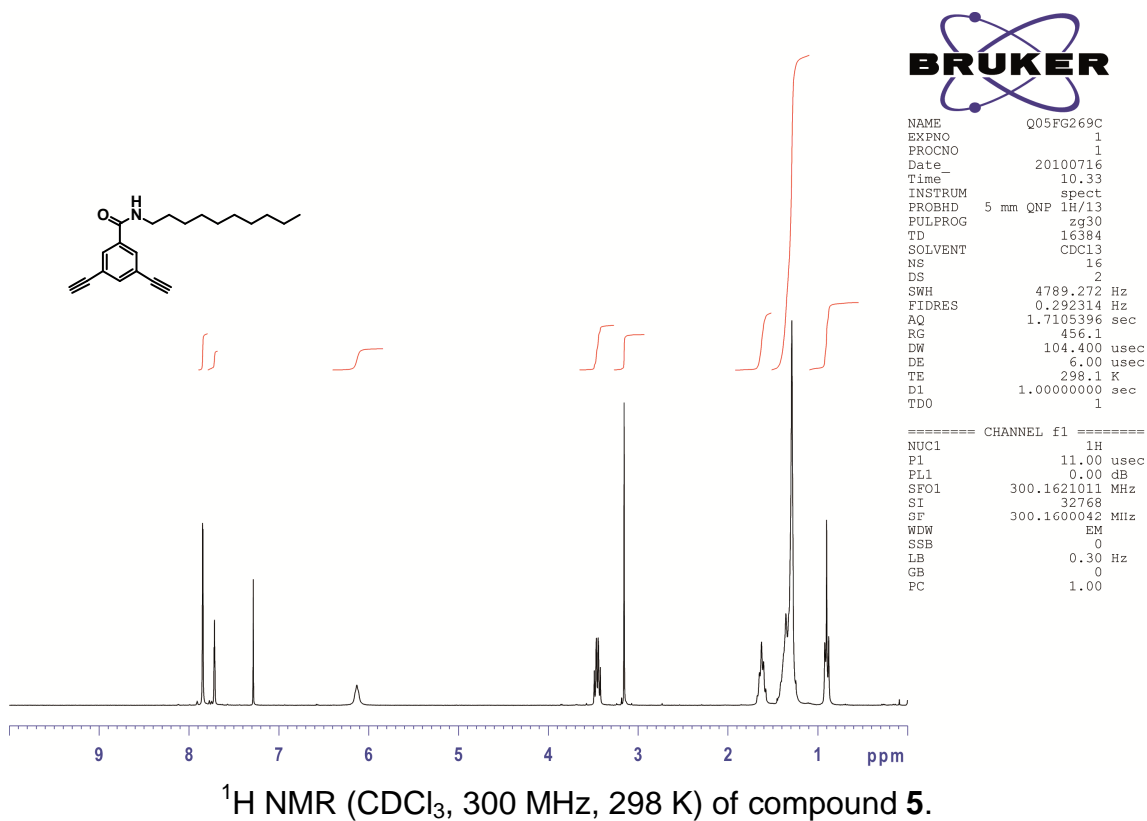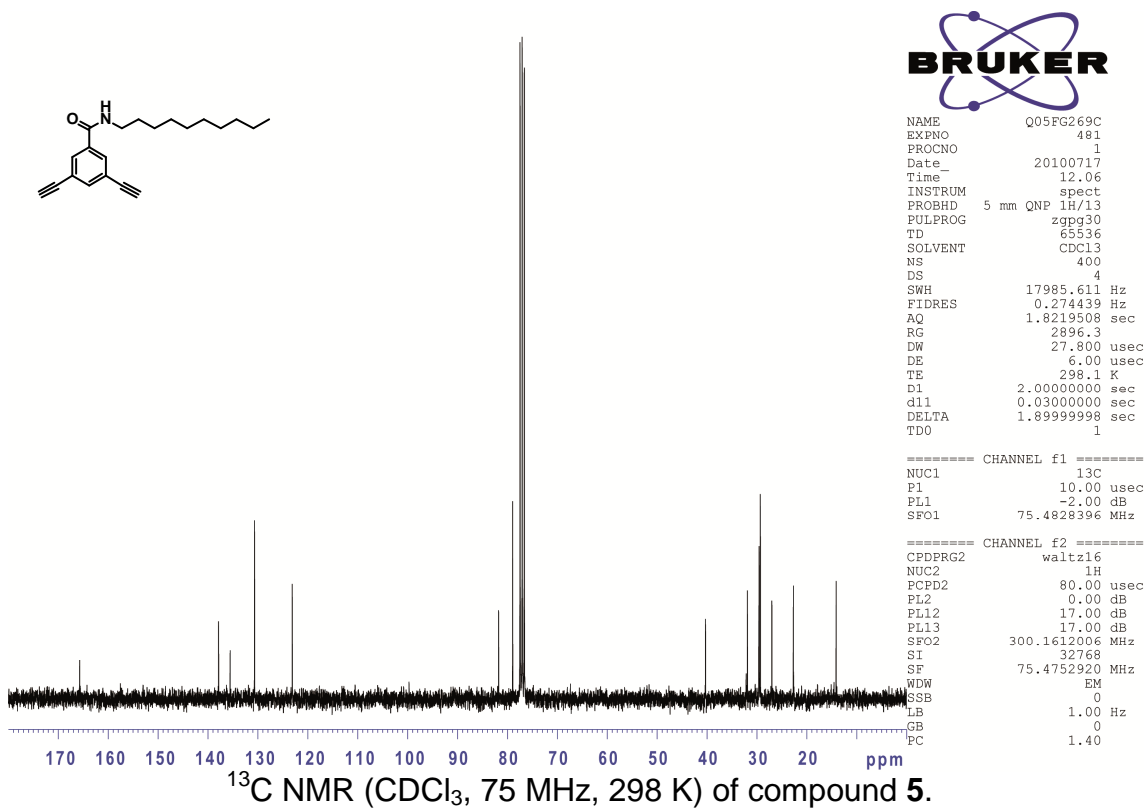

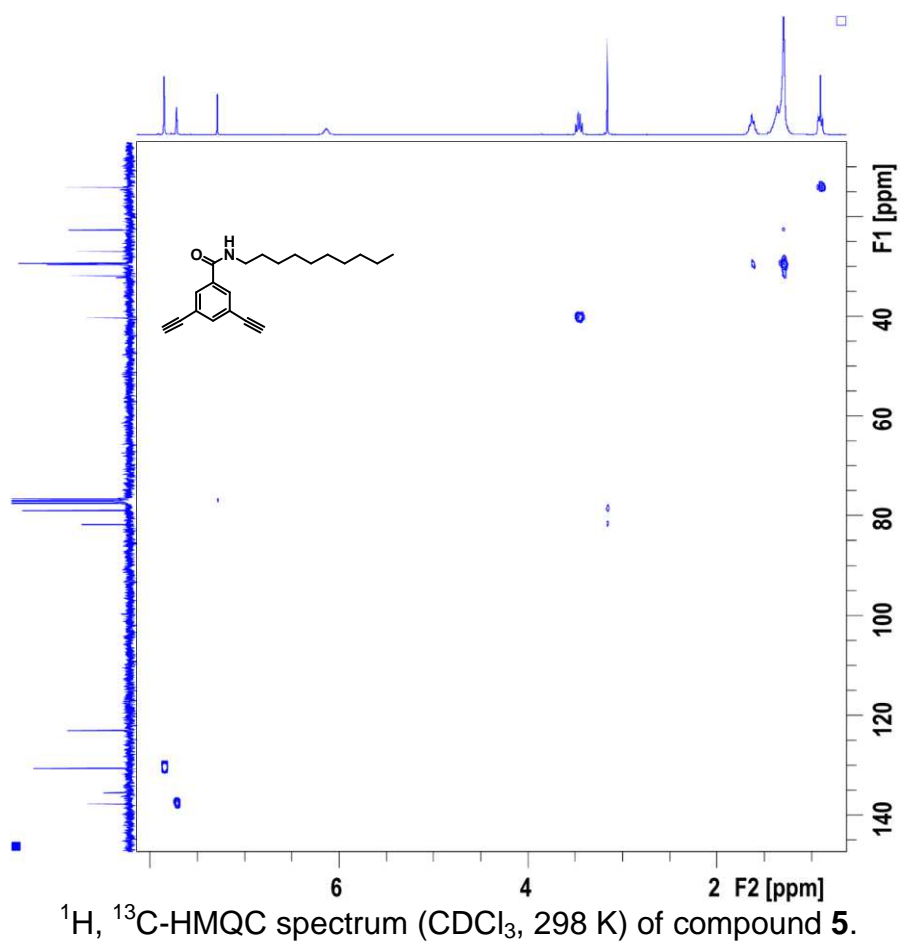

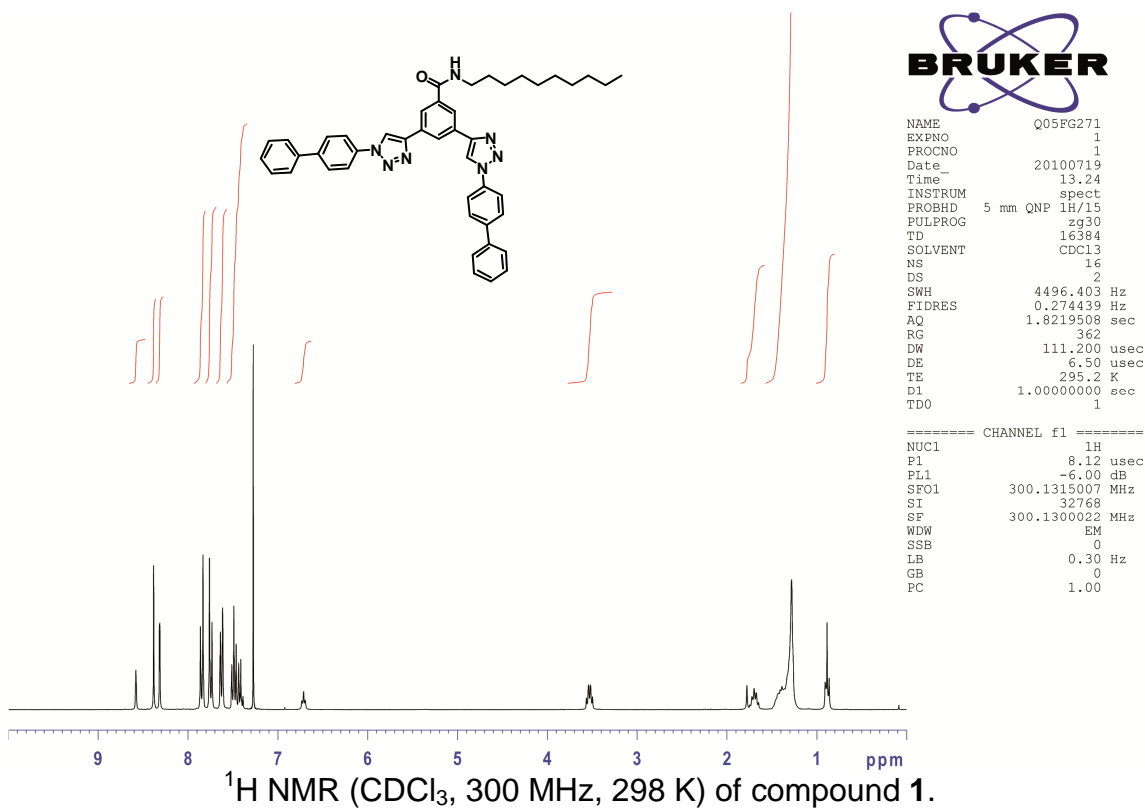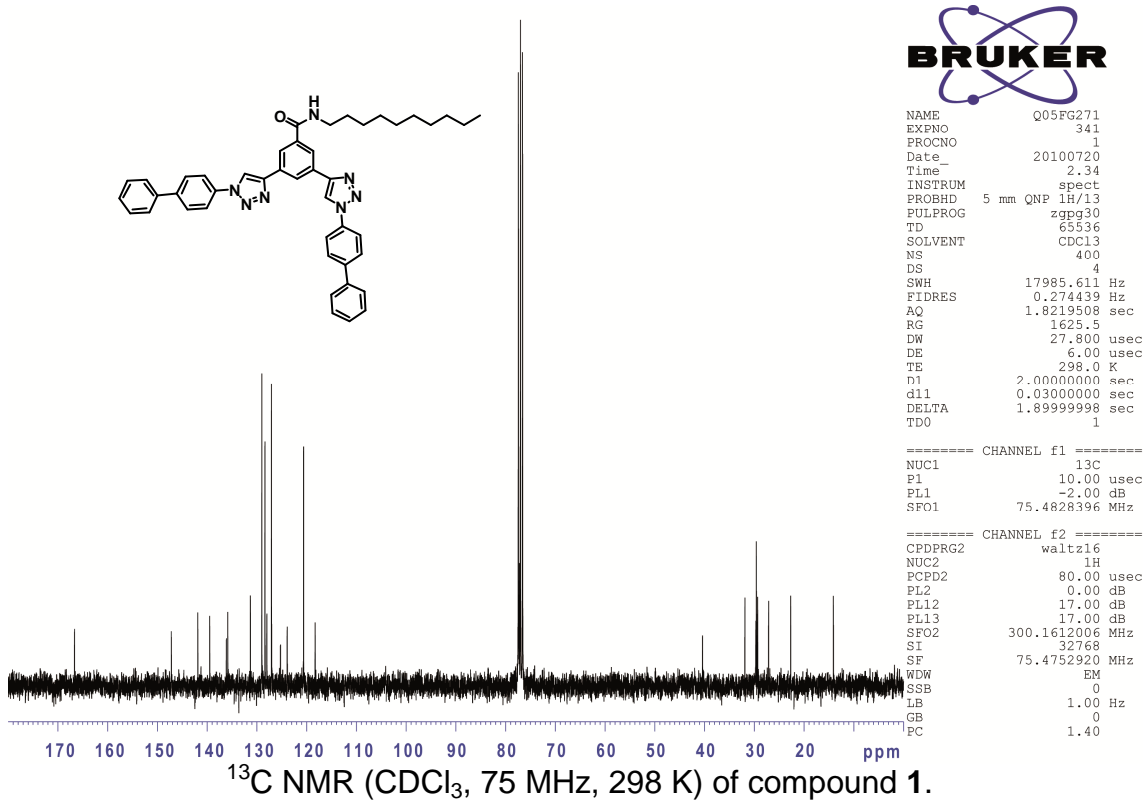



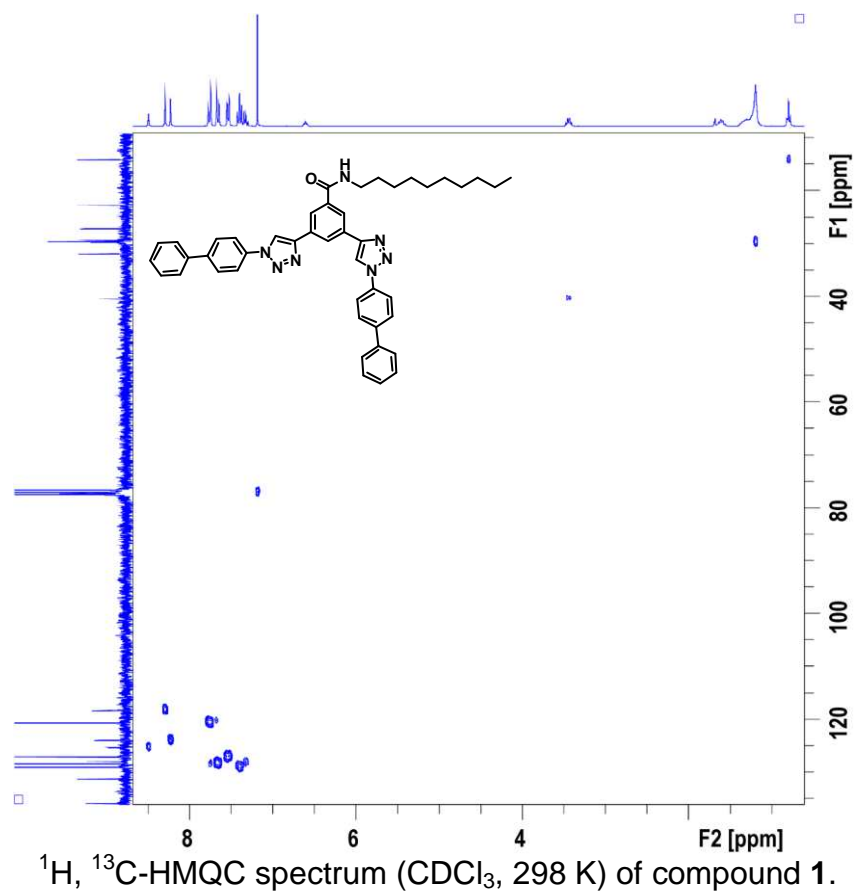

#### 4. Atomic coordinates and total energy for all optimized molecular structures at the M06-2X/6-311G\*\* level.

Compound 1 (Conformation A); E(RM062X) = -1846.25957560 au

| Center Number | Atomic Number | Atomic Type | Coordinates (Angstroms) |           |           |
|---------------|---------------|-------------|-------------------------|-----------|-----------|
|               |               |             | X                       | Y         | Z         |
| 1             | 6             | 0           | 0.377832                | 4.071866  | 0.069696  |
| 2             | 6             | 0           | -0.961013               | 3.693185  | 0.070574  |
| 3             | 1             | 0           | -1.762045               | 4.416810  | 0.162995  |
| 4             | 6             | 0           | -1.305629               | 2.342874  | -0.011461 |
| 5             | 6             | 0           | -0.301438               | 1.381030  | -0.081552 |
| 6             | 1             | 0           | -0.541423               | 0.326587  | -0.152901 |
| 7             | 6             | 0           | 1.042167                | 1.753259  | -0.059401 |
| 8             | 6             | 0           | 1.374475                | 3.103436  | 0.017774  |
| 9             | 1             | 0           | 2.405053                | 3.438035  | 0.041726  |
| 10            | 6             | 0           | -2.720216               | 1.956146  | -0.016812 |
| 11            | 6             | 0           | -3.301067               | 0.710167  | 0.007671  |
| 12            | 1             | 0           | -2.898434               | -0.285280 | 0.071292  |
| 13            | 6             | 0           | 2.080261                | 0.718988  | -0.117718 |
| 14            | 6             | 0           | 3.446615                | 0.825737  | -0.009647 |
| 15            | 1             | 0           | 4.104144                | 1.658103  | 0.168807  |
| 16            | 6             | 0           | -5.712949               | 0.038625  | -0.003058 |
| 17            | 6             | 0           | -5.541242               | -1.236055 | -0.530556 |
| 18            | 1             | 0           | -4.600999               | -1.517033 | -0.988757 |
| 19            | 6             | 0           | -6.599501               | -2.132430 | -0.503439 |
| 20            | 1             | 0           | -6.472831               | -3.117185 | -0.938023 |
| 21            | 6             | 0           | -7.838547               | -1.768827 | 0.029217  |
| 22            | 6             | 0           | -7.987911               | -0.475591 | 0.540106  |
| 23            | 1             | 0           | -8.934855               | -0.182031 | 0.978048  |
| 24            | 6             | 0           | -6.935828               | 0.426352  | 0.534192  |
| 25            | 1             | 0           | -7.043046               | 1.423106  | 0.940368  |
| 26            | 6             | 0           | -8.968432               | -2.729072 | 0.043187  |
| 27            | 6             | 0           | -8.757737               | -4.072686 | 0.364938  |
| 28            | 1             | 0           | -7.762197               | -4.406140 | 0.635977  |
| 29            | 6             | 0           | -9.815145               | -4.973240 | 0.372382  |
| 30            | 1             | 0           | -9.636270               | -6.009895 | 0.631898  |
| 31            | 6             | 0           | -11.100132              | -4.544785 | 0.057473  |
| 32            | 1             | 0           | -11.924957              | -5.246899 | 0.061994  |
| 33            | 6             | 0           | -11.320930              | -3.209762 | -0.263549 |
| 34            | 1             | 0           | -12.317669              | -2.870431 | -0.518829 |
| 35            | 6             | 0           | -10.263856              | -2.308848 | -0.270236 |
| 36            | 1             | 0           | -10.437002              | -1.274813 | -0.546883 |
| 37            | 6             | 0           | 5.226516                | -0.935109 | -0.085095 |
| 38            | 6             | 0           | 6.279571                | -0.108920 | -0.460339 |
| 39            | 1             | 0           | 6.087326                | 0.892723  | -0.824598 |
| 40            | 6             | 0           | 7.578552                | -0.593219 | -0.403630 |
| 41            | 1             | 0           | 8.397261                | 0.042485  | -0.719790 |
| 42            | 6             | 0           | 7.842495                | -1.901452 | 0.007909  |
| 43            | 6             | 0           | 6.763364                | -2.715264 | 0.367086  |
| 44            | 1             | 0           | 6.950048                | -3.725949 | 0.710997  |
| 45            | 6             | 0           | 5.461667                | -2.241379 | 0.330633  |
| 46            | 1             | 0           | 4.625011                | -2.862837 | 0.619650  |
| 47            | 6             | 0           | 9.232049                | -2.417212 | 0.052383  |
| 48            | 6             | 0           | 9.525059                | -3.709194 | -0.391924 |
| 49            | 1             | 0           | 8.730201                | -4.328597 | -0.792144 |
| 50            | 6             | 0           | 10.827138               | -4.191678 | -0.356347 |
| 51            | 1             | 0           | 11.039185               | -5.192454 | -0.713271 |

|    |   |   |           |           |           |
|----|---|---|-----------|-----------|-----------|
| 52 | 6 | 0 | 11.856685 | -3.390444 | 0.125332  |
| 53 | 1 | 0 | 12.872001 | -3.766891 | 0.153500  |
| 54 | 6 | 0 | 11.575810 | -2.103667 | 0.571193  |
| 55 | 1 | 0 | 12.370968 | -1.476312 | 0.955820  |
| 56 | 6 | 0 | 10.273923 | -1.620413 | 0.534540  |
| 57 | 1 | 0 | 10.056558 | -0.625199 | 0.906311  |
| 58 | 7 | 0 | -4.632119 | 0.961240  | -0.011016 |
| 59 | 7 | 0 | -4.862447 | 2.282717  | -0.041928 |
| 60 | 7 | 0 | -3.723781 | 2.880206  | -0.044706 |
| 61 | 7 | 0 | 3.891802  | -0.448623 | -0.124574 |
| 62 | 7 | 0 | 2.863046  | -1.294210 | -0.291336 |
| 63 | 7 | 0 | 1.779875  | -0.601096 | -0.286352 |
| 64 | 6 | 0 | 0.831906  | 5.505469  | 0.151984  |
| 65 | 8 | 0 | 1.966047  | 5.790590  | 0.485322  |
| 66 | 7 | 0 | -0.098588 | 6.443434  | -0.166125 |
| 67 | 1 | 0 | -0.947251 | 6.147381  | -0.618366 |
| 68 | 6 | 0 | 0.236430  | 7.854173  | -0.164670 |
| 69 | 1 | 0 | 0.997821  | 8.020068  | 0.594901  |
| 70 | 1 | 0 | 0.635656  | 8.180328  | -1.129383 |
| 71 | 1 | 0 | -0.650781 | 8.439589  | 0.075331  |

---

Compound 1 (Conformation B); E(RM062X) = -1846.25558023 au

| Center<br>Number | Atomic<br>Number | Atomic<br>Type | Coordinates (Angstroms) |           |           |
|------------------|------------------|----------------|-------------------------|-----------|-----------|
|                  |                  |                | X                       | Y         | Z         |
| 1                | 6                | 0              | 0.357819                | 4.133932  | -0.063735 |
| 2                | 6                | 0              | -0.983183               | 3.768510  | -0.112818 |
| 3                | 1                | 0              | -1.743689               | 4.534815  | -0.199264 |
| 4                | 6                | 0              | -1.340148               | 2.421781  | -0.053557 |
| 5                | 6                | 0              | -0.343053               | 1.450444  | 0.024392  |
| 6                | 1                | 0              | -0.591821               | 0.396299  | 0.059606  |
| 7                | 6                | 0              | 1.002851                | 1.808008  | 0.042546  |
| 8                | 6                | 0              | 1.349414                | 3.158948  | 0.005779  |
| 9                | 1                | 0              | 2.394405                | 3.450568  | -0.006316 |
| 10               | 6                | 0              | -2.754735               | 2.036308  | -0.081765 |
| 11               | 6                | 0              | -3.334211               | 0.790319  | -0.029186 |
| 12               | 1                | 0              | -2.931167               | -0.201799 | 0.072078  |
| 13               | 6                | 0              | 2.026655                | 0.757647  | 0.085310  |
| 14               | 6                | 0              | 3.397275                | 0.839957  | 0.010898  |
| 15               | 1                | 0              | 4.081371                | 1.665878  | -0.070214 |
| 16               | 6                | 0              | -5.745721               | 0.115860  | -0.069796 |
| 17               | 6                | 0              | -5.555482               | -1.189010 | -0.509936 |
| 18               | 1                | 0              | -4.597821               | -1.499029 | -0.909438 |
| 19               | 6                | 0              | -6.615517               | -2.082996 | -0.471051 |
| 20               | 1                | 0              | -6.472893               | -3.092615 | -0.838155 |
| 21               | 6                | 0              | -7.874838               | -1.688132 | -0.013607 |
| 22               | 6                | 0              | -8.042689               | -0.365789 | 0.408674  |
| 23               | 1                | 0              | -9.006733               | -0.045825 | 0.786726  |
| 24               | 6                | 0              | -6.989835               | 0.534941  | 0.390802  |
| 25               | 1                | 0              | -7.111697               | 1.554843  | 0.729278  |
| 26               | 6                | 0              | -9.006373               | -2.646063 | 0.015489  |
| 27               | 6                | 0              | -8.814027               | -3.963830 | 0.438966  |
| 28               | 1                | 0              | -7.832112               | -4.277585 | 0.775358  |
| 29               | 6                | 0              | -9.873622               | -4.861581 | 0.463081  |
| 30               | 1                | 0              | -9.710124               | -5.877347 | 0.802830  |
| 31               | 6                | 0              | -11.142428              | -4.456013 | 0.063554  |
| 32               | 1                | 0              | -11.968926              | -5.155980 | 0.081707  |
| 33               | 6                | 0              | -11.344904              | -3.146747 | -0.359306 |
| 34               | 1                | 0              | -12.328569              | -2.825631 | -0.680401 |
| 35               | 6                | 0              | -10.285687              | -2.248617 | -0.382617 |
| 36               | 1                | 0              | -10.442549              | -1.236434 | -0.738405 |
| 37               | 6                | 0              | 5.140740                | -0.960934 | 0.062405  |
| 38               | 6                | 0              | 6.144053                | -0.263215 | -0.600109 |
| 39               | 1                | 0              | 5.915662                | 0.653837  | -1.129048 |
| 40               | 6                | 0              | 7.432791                | -0.777451 | -0.619145 |
| 41               | 1                | 0              | 8.208883                | -0.247952 | -1.159500 |
| 42               | 6                | 0              | 7.732946                | -1.992432 | 0.000985  |
| 43               | 6                | 0              | 6.702292                | -2.678244 | 0.651801  |
| 44               | 1                | 0              | 6.920864                | -3.610796 | 1.158765  |
| 45               | 6                | 0              | 5.414026                | -2.170153 | 0.693306  |
| 46               | 1                | 0              | 4.616351                | -2.692156 | 1.204389  |
| 47               | 6                | 0              | 9.106126                | -2.550331 | -0.042594 |
| 48               | 6                | 0              | 9.308187                | -3.915563 | -0.262608 |
| 49               | 1                | 0              | 8.453015                | -4.562188 | -0.424829 |
| 50               | 6                | 0              | 10.592450               | -4.442252 | -0.310204 |
| 51               | 1                | 0              | 10.733080               | -5.501143 | -0.491458 |
| 52               | 6                | 0              | 11.694817               | -3.612502 | -0.137373 |
| 53               | 1                | 0              | 12.696548               | -4.023013 | -0.174717 |
| 54               | 6                | 0              | 11.504951               | -2.252639 | 0.083221  |

|    |   |   |           |           |           |
|----|---|---|-----------|-----------|-----------|
| 55 | 1 | 0 | 12.358540 | -1.601193 | 0.227589  |
| 56 | 6 | 0 | 10.220529 | -1.725277 | 0.129478  |
| 57 | 1 | 0 | 10.076497 | -0.668601 | 0.326162  |
| 58 | 7 | 0 | -4.664561 | 1.037301  | -0.087665 |
| 59 | 7 | 0 | -4.894580 | 2.358234  | -0.168861 |
| 60 | 7 | 0 | -3.758127 | 2.957274  | -0.164771 |
| 61 | 7 | 0 | 3.816310  | -0.446352 | 0.094999  |
| 62 | 7 | 0 | 2.768521  | -1.275169 | 0.214995  |
| 63 | 7 | 0 | 1.699334  | -0.561357 | 0.210039  |
| 64 | 6 | 0 | 0.680632  | 5.601287  | -0.125466 |
| 65 | 8 | 0 | -0.051282 | 6.399303  | -0.669969 |
| 66 | 7 | 0 | 1.858305  | 5.969405  | 0.463980  |
| 67 | 1 | 0 | 2.248190  | 5.344207  | 1.150822  |
| 68 | 6 | 0 | 2.203063  | 7.377432  | 0.543122  |
| 69 | 1 | 0 | 2.027456  | 7.833121  | -0.429823 |
| 70 | 1 | 0 | 1.593665  | 7.908026  | 1.280559  |
| 71 | 1 | 0 | 3.256436  | 7.474299  | 0.802812  |

---

Complex 1•F<sup>-</sup>; E(RM062X) = -1946.18188703 au

| Center<br>Number | Atomic<br>Number | Atomic<br>Type | Coordinates (Angstroms) |           |           |
|------------------|------------------|----------------|-------------------------|-----------|-----------|
|                  |                  |                | X                       | Y         | Z         |
| 1                | 6                | 0              | -9.634806               | -3.426512 | 0.119101  |
| 2                | 6                | 0              | -9.691222               | -2.032350 | 0.030453  |
| 3                | 6                | 0              | -10.943572              | -1.421199 | -0.080735 |
| 4                | 6                | 0              | -12.105735              | -2.182267 | -0.101863 |
| 5                | 6                | 0              | -12.036720              | -3.568524 | -0.013903 |
| 6                | 6                | 0              | -10.796443              | -4.187852 | 0.095929  |
| 7                | 6                | 0              | -8.448971               | -1.223657 | 0.056126  |
| 8                | 6                | 0              | -7.306133               | -1.646249 | -0.625982 |
| 9                | 6                | 0              | -6.139061               | -0.897083 | -0.602977 |
| 10               | 6                | 0              | -6.096672               | 0.289204  | 0.123480  |
| 11               | 6                | 0              | -7.225047               | 0.733062  | 0.808977  |
| 12               | 6                | 0              | -8.387938               | -0.019349 | 0.764235  |
| 13               | 7                | 0              | -4.906348               | 1.050088  | 0.170255  |
| 14               | 7                | 0              | -4.941819               | 2.361658  | 0.467757  |
| 15               | 7                | 0              | -3.737208               | 2.806681  | 0.430478  |
| 16               | 6                | 0              | -2.876127               | 1.792218  | 0.108430  |
| 17               | 6                | 0              | -3.627613               | 0.655212  | -0.063758 |
| 18               | 6                | 0              | -1.425002               | 1.971245  | -0.023857 |
| 19               | 6                | 0              | -0.596955               | 0.841753  | -0.091880 |
| 20               | 6                | 0              | 0.771066                | 0.997704  | -0.262201 |
| 21               | 6                | 0              | 1.301145                | 2.284099  | -0.387260 |
| 22               | 6                | 0              | 0.503758                | 3.402949  | -0.233887 |
| 23               | 6                | 0              | -0.872408               | 3.252581  | -0.067928 |
| 24               | 6                | 0              | 1.132637                | 4.774352  | -0.215303 |
| 25               | 7                | 0              | 2.474519                | 4.796741  | -0.097640 |
| 26               | 6                | 0              | 3.144953                | 6.076003  | -0.095323 |
| 27               | 6                | 0              | 1.763896                | -0.080566 | -0.239661 |
| 28               | 6                | 0              | 3.101526                | 0.150379  | -0.022850 |
| 29               | 7                | 0              | 3.652662                | -1.075249 | -0.120362 |
| 30               | 7                | 0              | 2.714776                | -2.019764 | -0.361027 |
| 31               | 7                | 0              | 1.573208                | -1.418296 | -0.427475 |
| 32               | 6                | 0              | 5.033529                | -1.370589 | -0.059893 |
| 33               | 6                | 0              | 5.948520                | -0.316858 | -0.105658 |
| 34               | 6                | 0              | 7.302147                | -0.608917 | -0.036928 |
| 35               | 6                | 0              | 7.763628                | -1.925446 | 0.065012  |
| 36               | 6                | 0              | 6.821996                | -2.957532 | 0.098273  |
| 37               | 6                | 0              | 5.462530                | -2.689883 | 0.040585  |
| 38               | 6                | 0              | 9.215111                | -2.218157 | 0.138714  |
| 39               | 6                | 0              | 10.075494               | -1.391509 | 0.868559  |
| 40               | 6                | 0              | 11.435978               | -1.662809 | 0.938705  |
| 41               | 6                | 0              | 11.964826               | -2.769777 | 0.283394  |
| 42               | 6                | 0              | 11.120046               | -3.600945 | -0.444474 |
| 43               | 6                | 0              | 9.760173                | -3.326412 | -0.517669 |
| 44               | 8                | 0              | 0.443292                | 5.786517  | -0.283308 |
| 45               | 1                | 0              | 2.366588                | 2.397162  | -0.568850 |
| 46               | 1                | 0              | -1.005698               | -0.157729 | 0.015551  |
| 47               | 1                | 0              | -1.500553               | 4.130840  | 0.021771  |
| 48               | 1                | 0              | 3.642827                | 1.091497  | 0.174361  |
| 49               | 1                | 0              | -3.363192               | -0.358203 | -0.306620 |
| 50               | 1                | 0              | 5.602233                | 0.712034  | -0.200962 |
| 51               | 1                | 0              | 8.015116                | 0.205630  | -0.094975 |
| 52               | 1                | 0              | 7.157369                | -3.983339 | 0.203306  |
| 53               | 1                | 0              | 4.724587                | -3.479953 | 0.077792  |
| 54               | 1                | 0              | 9.665077                | -0.541574 | 1.402007  |



|    |   |   |            |           |           |
|----|---|---|------------|-----------|-----------|
| 55 | 1 | 0 | 12.083239  | -1.012398 | 1.515775  |
| 56 | 1 | 0 | 13.025992  | -2.982070 | 0.338466  |
| 57 | 1 | 0 | 11.523201  | -4.461292 | -0.966334 |
| 58 | 1 | 0 | 9.112133   | -3.961366 | -1.111625 |
| 59 | 1 | 0 | -5.275884  | -1.219935 | -1.171011 |
| 60 | 1 | 0 | -7.338619  | -2.557080 | -1.212806 |
| 61 | 1 | 0 | -9.256159  | 0.316007  | 1.320296  |
| 62 | 1 | 0 | -7.168311  | 1.657388  | 1.367493  |
| 63 | 1 | 0 | -11.001481 | -0.342609 | -0.176398 |
| 64 | 1 | 0 | -13.067353 | -1.691584 | -0.197366 |
| 65 | 1 | 0 | -12.943120 | -4.161971 | -0.030394 |
| 66 | 1 | 0 | -10.733013 | -5.266973 | 0.173814  |
| 67 | 1 | 0 | -8.672230  | -3.912470 | 0.233786  |
| 68 | 1 | 0 | 3.086654   | 3.952010  | 0.005438  |
| 69 | 1 | 0 | 2.868578   | 6.664166  | -0.974987 |
| 70 | 1 | 0 | 2.880901   | 6.667967  | 0.787434  |
| 71 | 1 | 0 | 4.218157   | 5.888537  | -0.100705 |
| 72 | 9 | 0 | 4.169211   | 2.713804  | -0.018622 |

---

Complex 1•Cl<sup>-</sup>; E(RM062X) = -2306.58593432 au

| Center<br>Number | Atomic<br>Number | Atomic<br>Type | Coordinates (Angstroms) |           |           |
|------------------|------------------|----------------|-------------------------|-----------|-----------|
|                  |                  |                | X                       | Y         | Z         |
| 1                | 6                | 0              | -9.454640               | -3.731090 | 0.234528  |
| 2                | 6                | 0              | -9.574087               | -2.350770 | 0.048750  |
| 3                | 6                | 0              | -10.851034              | -1.809357 | -0.127538 |
| 4                | 6                | 0              | -11.975827              | -2.624436 | -0.116747 |
| 5                | 6                | 0              | -11.844494              | -3.996380 | 0.069039  |
| 6                | 6                | 0              | -10.579229              | -4.546742 | 0.243467  |
| 7                | 6                | 0              | -8.374787               | -1.479240 | 0.042804  |
| 8                | 6                | 0              | -7.193416               | -1.887087 | -0.580221 |
| 9                | 6                | 0              | -6.070281               | -1.072601 | -0.590221 |
| 10               | 6                | 0              | -6.113263               | 0.164811  | 0.044046  |
| 11               | 6                | 0              | -7.280169               | 0.594084  | 0.671131  |
| 12               | 6                | 0              | -8.397792               | -0.224634 | 0.660081  |
| 13               | 7                | 0              | -4.970219               | 0.997808  | 0.057152  |
| 14               | 7                | 0              | -5.096919               | 2.328560  | 0.208084  |
| 15               | 7                | 0              | -3.919660               | 2.840765  | 0.182131  |
| 16               | 6                | 0              | -2.986786               | 1.854401  | 0.014529  |
| 17               | 6                | 0              | -3.660975               | 0.659789  | -0.068568 |
| 18               | 6                | 0              | -1.544150               | 2.120423  | -0.047834 |
| 19               | 6                | 0              | -0.641781               | 1.054275  | -0.090328 |
| 20               | 6                | 0              | 0.724761                | 1.296895  | -0.156616 |
| 21               | 6                | 0              | 1.189056                | 2.613619  | -0.186059 |
| 22               | 6                | 0              | 0.299819                | 3.677219  | -0.121913 |
| 23               | 6                | 0              | -1.070634               | 3.431864  | -0.058792 |
| 24               | 6                | 0              | 0.763647                | 5.115094  | -0.129356 |
| 25               | 7                | 0              | 2.090223                | 5.321287  | -0.023281 |
| 26               | 6                | 0              | 2.614548                | 6.668630  | -0.047257 |
| 27               | 6                | 0              | 1.705169                | 0.208336  | -0.174870 |
| 28               | 6                | 0              | 3.071429                | 0.326431  | -0.095165 |
| 29               | 7                | 0              | 3.511224                | -0.950717 | -0.137675 |
| 30               | 7                | 0              | 2.479201                | -1.812498 | -0.235067 |
| 31               | 7                | 0              | 1.393569                | -1.117943 | -0.255954 |
| 32               | 6                | 0              | 4.853903                | -1.404717 | -0.087194 |
| 33               | 6                | 0              | 5.893700                | -0.477428 | -0.048445 |
| 34               | 6                | 0              | 7.201060                | -0.937448 | 0.007099  |
| 35               | 6                | 0              | 7.495209                | -2.303556 | 0.022302  |
| 36               | 6                | 0              | 6.431493                | -3.209303 | -0.019365 |
| 37               | 6                | 0              | 5.117552                | -2.771958 | -0.072753 |
| 38               | 6                | 0              | 8.896606                | -2.783317 | 0.086523  |
| 39               | 6                | 0              | 9.841561                | -2.132067 | 0.885298  |
| 40               | 6                | 0              | 11.152935               | -2.586071 | 0.949214  |
| 41               | 6                | 0              | 11.545596               | -3.701750 | 0.217275  |
| 42               | 6                | 0              | 10.615498               | -4.357484 | -0.582125 |
| 43               | 6                | 0              | 9.305077                | -3.901320 | -0.647838 |
| 44               | 8                | 0              | -0.041396               | 6.031145  | -0.224190 |
| 45               | 1                | 0              | 2.257547                | 2.785602  | -0.261983 |
| 46               | 1                | 0              | -0.983136               | 0.025089  | -0.063802 |
| 47               | 1                | 0              | -1.755146               | 4.270188  | -0.022779 |
| 48               | 1                | 0              | 3.717551                | 1.194236  | -0.005549 |
| 49               | 1                | 0              | -3.328037               | -0.357177 | -0.174102 |
| 50               | 1                | 0              | 5.700618                | 0.592086  | -0.065868 |
| 51               | 1                | 0              | 8.007093                | -0.212795 | 0.013506  |
| 52               | 1                | 0              | 6.633571                | -4.273829 | 0.019362  |
| 53               | 1                | 0              | 4.289254                | -3.466454 | -0.093460 |

|    |    |   |            |           |           |
|----|----|---|------------|-----------|-----------|
| 54 | 1  | 0 | 9.536380   | -1.276134 | 1.476753  |
| 55 | 1  | 0 | 11.868457  | -2.070836 | 1.579416  |
| 56 | 1  | 0 | 12.568307  | -4.056193 | 0.268331  |
| 57 | 1  | 0 | 10.912904  | -5.221599 | -1.165295 |
| 58 | 1  | 0 | 8.590993   | -4.399150 | -1.294246 |
| 59 | 1  | 0 | -5.175834  | -1.385742 | -1.113960 |
| 60 | 1  | 0 | -7.161660  | -2.839070 | -1.097477 |
| 61 | 1  | 0 | -9.296717  | 0.101197  | 1.170882  |
| 62 | 1  | 0 | -7.288153  | 1.559093  | 1.159275  |
| 63 | 1  | 0 | -10.957631 | -0.744044 | -0.299026 |
| 64 | 1  | 0 | -12.956841 | -2.187219 | -0.262236 |
| 65 | 1  | 0 | -12.721901 | -4.632046 | 0.077168  |
| 66 | 1  | 0 | -10.467118 | -5.613618 | 0.397292  |
| 67 | 1  | 0 | -8.473433  | -4.162803 | 0.398429  |
| 68 | 1  | 0 | 2.771872   | 4.572782  | 0.087748  |
| 69 | 1  | 0 | 2.281530   | 7.194495  | -0.945299 |
| 70 | 1  | 0 | 2.272892   | 7.241241  | 0.819928  |
| 71 | 1  | 0 | 3.701544   | 6.601455  | -0.038589 |
| 72 | 17 | 0 | 4.749571   | 3.310503  | 0.104711  |

---

Complex 1•Br<sup>-</sup>; E(RM062X) = -4420.56649559 au

| Center<br>Number | Atomic<br>Number | Atomic<br>Type | Coordinates (Angstroms) |           |           |
|------------------|------------------|----------------|-------------------------|-----------|-----------|
|                  |                  |                | X                       | Y         | Z         |
| 1                | 6                | 0              | -9.741692               | -3.710370 | 0.212233  |
| 2                | 6                | 0              | -9.851379               | -2.325740 | 0.054649  |
| 3                | 6                | 0              | -11.125238              | -1.770034 | -0.097194 |
| 4                | 6                | 0              | -12.256768              | -2.575937 | -0.090570 |
| 5                | 6                | 0              | -12.135178              | -3.952270 | 0.067014  |
| 6                | 6                | 0              | -10.873002              | -4.516653 | 0.217436  |
| 7                | 6                | 0              | -8.643665               | -1.465883 | 0.052141  |
| 8                | 6                | 0              | -7.476818               | -1.870543 | -0.599643 |
| 9                | 6                | 0              | -6.344226               | -1.069487 | -0.604568 |
| 10               | 6                | 0              | -6.362500               | 0.150468  | 0.063963  |
| 11               | 6                | 0              | -7.514890               | 0.576988  | 0.718918  |
| 12               | 6                | 0              | -8.642834               | -0.227830 | 0.702227  |
| 13               | 7                | 0              | -5.206793               | 0.966024  | 0.084464  |
| 14               | 7                | 0              | -5.307904               | 2.293286  | 0.279236  |
| 15               | 7                | 0              | -4.122214               | 2.786320  | 0.249125  |
| 16               | 6                | 0              | -3.210058               | 1.789952  | 0.035176  |
| 17               | 6                | 0              | -3.906160               | 0.610249  | -0.073914 |
| 18               | 6                | 0              | -1.763817               | 2.028804  | -0.047783 |
| 19               | 6                | 0              | -0.885143               | 0.944373  | -0.102724 |
| 20               | 6                | 0              | 0.485076                | 1.155819  | -0.195946 |
| 21               | 6                | 0              | 0.978441                | 2.461701  | -0.240528 |
| 22               | 6                | 0              | 0.112416                | 3.544357  | -0.157910 |
| 23               | 6                | 0              | -1.261608               | 3.329163  | -0.069024 |
| 24               | 6                | 0              | 0.602352                | 4.973233  | -0.180483 |
| 25               | 7                | 0              | 1.930196                | 5.154867  | -0.047480 |
| 26               | 6                | 0              | 2.488965                | 6.487936  | -0.090059 |
| 27               | 6                | 0              | 1.431156                | 0.037807  | -0.225305 |
| 28               | 6                | 0              | 2.798557                | 0.101151  | -0.112505 |
| 29               | 7                | 0              | 3.191300                | -1.190606 | -0.184899 |
| 30               | 7                | 0              | 2.129878                | -2.008315 | -0.329433 |
| 31               | 7                | 0              | 1.072006                | -1.272956 | -0.351524 |
| 32               | 6                | 0              | 4.513244                | -1.702011 | -0.123423 |
| 33               | 6                | 0              | 5.593405                | -0.822343 | -0.096804 |
| 34               | 6                | 0              | 6.878376                | -1.340385 | -0.026767 |
| 35               | 6                | 0              | 7.110200                | -2.717735 | 0.012717  |
| 36               | 6                | 0              | 6.006737                | -3.575238 | -0.019223 |
| 37               | 6                | 0              | 4.714303                | -3.079266 | -0.084511 |
| 38               | 6                | 0              | 8.489076                | -3.256986 | 0.092427  |
| 39               | 6                | 0              | 9.455520                | -2.634625 | 0.888613  |
| 40               | 6                | 0              | 10.746607               | -3.141262 | 0.966644  |
| 41               | 6                | 0              | 11.096509               | -4.282174 | 0.252095  |
| 42               | 6                | 0              | 10.144688               | -4.909768 | -0.544300 |
| 43               | 6                | 0              | 8.854471                | -4.400986 | -0.624168 |
| 44               | 8                | 0              | -0.182273               | 5.901956  | -0.310523 |
| 45               | 1                | 0              | 2.048165                | 2.611291  | -0.350334 |
| 46               | 1                | 0              | -1.247369               | -0.077117 | -0.065016 |
| 47               | 1                | 0              | -1.927088               | 4.182372  | -0.024850 |
| 48               | 1                | 0              | 3.475223                | 0.938510  | 0.023280  |
| 49               | 1                | 0              | -3.592764               | -0.407923 | -0.219370 |
| 50               | 1                | 0              | 5.448790                | 0.254444  | -0.134184 |
| 51               | 1                | 0              | 7.716066                | -0.652562 | -0.028494 |
| 52               | 1                | 0              | 6.160176                | -4.647018 | 0.038359  |
| 53               | 1                | 0              | 3.855835                | -3.736281 | -0.096356 |

|    |    |   |            |           |           |
|----|----|---|------------|-----------|-----------|
| 54 | 1  | 0 | 9.182003   | -1.758937 | 1.466490  |
| 55 | 1  | 0 | 11.479396  | -2.647781 | 1.594395  |
| 56 | 1  | 0 | 12.103448  | -4.677620 | 0.314311  |
| 57 | 1  | 0 | 10.410084  | -5.792945 | -1.114142 |
| 58 | 1  | 0 | 8.124195   | -4.877194 | -1.268820 |
| 59 | 1  | 0 | -5.461659  | -1.379183 | -1.150029 |
| 60 | 1  | 0 | -7.464531  | -2.808665 | -1.142355 |
| 61 | 1  | 0 | -9.530270  | 0.094509  | 1.234937  |
| 62 | 1  | 0 | -7.503602  | 1.528142  | 1.233491  |
| 63 | 1  | 0 | -11.224274 | -0.700612 | -0.246520 |
| 64 | 1  | 0 | -13.235528 | -2.128102 | -0.217728 |
| 65 | 1  | 0 | -13.017845 | -4.580663 | 0.071978  |
| 66 | 1  | 0 | -10.768552 | -5.587272 | 0.349225  |
| 67 | 1  | 0 | -8.762382  | -4.153049 | 0.357306  |
| 68 | 1  | 0 | 2.585996   | 4.393479  | 0.111038  |
| 69 | 1  | 0 | 2.159656   | 7.009930  | -0.991200 |
| 70 | 1  | 0 | 2.171546   | 7.079350  | 0.773852  |
| 71 | 1  | 0 | 3.574004   | 6.392331  | -0.091478 |
| 72 | 35 | 0 | 4.738956   | 3.107020  | 0.131044  |

---

Complex 1•I<sup>-</sup>; E(RM062X) = -8766.32042427 au

| Center<br>Number | Atomic<br>Number | Atomic<br>Type | Coordinates (Angstroms) |           |           |
|------------------|------------------|----------------|-------------------------|-----------|-----------|
|                  |                  |                | X                       | Y         | Z         |
| 1                | 6                | 0              | -10.092841              | -3.551737 | 0.778505  |
| 2                | 6                | 0              | -10.146986              | -2.271524 | 0.219959  |
| 3                | 6                | 0              | -11.380404              | -1.790581 | -0.229277 |
| 4                | 6                | 0              | -12.526825              | -2.567418 | -0.121831 |
| 5                | 6                | 0              | -12.460829              | -3.839769 | 0.435698  |
| 6                | 6                | 0              | -11.239046              | -4.329234 | 0.885085  |
| 7                | 6                | 0              | -8.923238               | -1.442326 | 0.106682  |
| 8                | 6                | 0              | -7.705717               | -2.010772 | -0.273247 |
| 9                | 6                | 0              | -6.558384               | -1.239154 | -0.385781 |
| 10               | 6                | 0              | -6.614594               | 0.121074  | -0.098675 |
| 11               | 6                | 0              | -7.817636               | 0.711149  | 0.280776  |
| 12               | 6                | 0              | -8.957956               | -0.070076 | 0.373422  |
| 13               | 7                | 0              | -5.447176               | 0.916060  | -0.186594 |
| 14               | 7                | 0              | -5.537932               | 2.248817  | -0.344606 |
| 15               | 7                | 0              | -4.344958               | 2.722030  | -0.390041 |
| 16               | 6                | 0              | -3.437894               | 1.706456  | -0.263650 |
| 17               | 6                | 0              | -4.144789               | 0.535945  | -0.128798 |
| 18               | 6                | 0              | -1.986424               | 1.925844  | -0.265189 |
| 19               | 6                | 0              | -1.118138               | 0.833880  | -0.310380 |
| 20               | 6                | 0              | 0.258650                | 1.028970  | -0.304348 |
| 21               | 6                | 0              | 0.769032                | 2.328265  | -0.260132 |
| 22               | 6                | 0              | -0.090413               | 3.419336  | -0.199994 |
| 23               | 6                | 0              | -1.468896               | 3.218896  | -0.212121 |
| 24               | 6                | 0              | 0.402479                | 4.846392  | -0.138508 |
| 25               | 7                | 0              | 1.718000                | 5.018918  | 0.090883  |
| 26               | 6                | 0              | 2.287086                | 6.347836  | 0.133537  |
| 27               | 6                | 0              | 1.178777                | -0.111213 | -0.339770 |
| 28               | 6                | 0              | 2.545174                | -0.106150 | -0.194943 |
| 29               | 7                | 0              | 2.890276                | -1.410732 | -0.298359 |
| 30               | 7                | 0              | 1.801660                | -2.179024 | -0.492213 |
| 31               | 7                | 0              | 0.774432                | -1.403095 | -0.515393 |
| 32               | 6                | 0              | 4.186736                | -1.985254 | -0.225487 |
| 33               | 6                | 0              | 5.305521                | -1.162548 | -0.122040 |
| 34               | 6                | 0              | 6.562883                | -1.743098 | -0.043925 |
| 35               | 6                | 0              | 6.729666                | -3.129746 | -0.069950 |
| 36               | 6                | 0              | 5.589037                | -3.930320 | -0.178440 |
| 37               | 6                | 0              | 4.323400                | -3.370768 | -0.253928 |
| 38               | 6                | 0              | 8.079337                | -3.735771 | 0.024495  |
| 39               | 6                | 0              | 9.042654                | -3.198406 | 0.884096  |
| 40               | 6                | 0              | 10.307321               | -3.764785 | 0.978074  |
| 41               | 6                | 0              | 10.633434               | -4.881768 | 0.216001  |
| 42               | 6                | 0              | 9.684296                | -5.425411 | -0.643087 |
| 43               | 6                | 0              | 8.420172                | -4.857065 | -0.738541 |
| 44               | 8                | 0              | -0.369819               | 5.781536  | -0.288182 |
| 45               | 1                | 0              | 1.845436                | 2.466555  | -0.290314 |
| 46               | 1                | 0              | -1.493307               | -0.182188 | -0.361690 |
| 47               | 1                | 0              | -2.125502               | 4.079531  | -0.184188 |
| 48               | 1                | 0              | 3.252031                | 0.694919  | -0.017847 |
| 49               | 1                | 0              | -3.839733               | -0.481833 | 0.035868  |
| 50               | 1                | 0              | 5.215878                | -0.080330 | -0.104410 |
| 51               | 1                | 0              | 7.429972                | -1.095133 | 0.014080  |
| 52               | 1                | 0              | 5.690785                | -5.009783 | -0.172794 |
| 53               | 1                | 0              | 3.437155                | -3.985826 | -0.323699 |
| 54               | 1                | 0              | 8.785859                | -2.341919 | 1.497300  |



|    |    |   |            |           |           |
|----|----|---|------------|-----------|-----------|
| 55 | 1  | 0 | 11.037516  | -3.337102 | 1.655313  |
| 56 | 1  | 0 | 11.619948  | -5.323933 | 0.290659  |
| 57 | 1  | 0 | 9.932431   | -6.289642 | -1.248632 |
| 58 | 1  | 0 | 7.693274   | -5.267852 | -1.430549 |
| 59 | 1  | 0 | -5.632377  | -1.688186 | -0.722156 |
| 60 | 1  | 0 | -7.662127  | -3.065297 | -0.520407 |
| 61 | 1  | 0 | -9.887547  | 0.387140  | 0.692847  |
| 62 | 1  | 0 | -7.835985  | 1.769602  | 0.501382  |
| 63 | 1  | 0 | -11.433564 | -0.809869 | -0.688704 |
| 64 | 1  | 0 | -13.472777 | -2.181462 | -0.483572 |
| 65 | 1  | 0 | -13.355121 | -4.445902 | 0.517423  |
| 66 | 1  | 0 | -11.178351 | -5.316497 | 1.327822  |
| 67 | 1  | 0 | -9.147672  | -3.927880 | 1.154296  |
| 68 | 1  | 0 | 2.352581   | 4.248075  | 0.270472  |
| 69 | 1  | 0 | 1.996981   | 6.911152  | -0.755596 |
| 70 | 1  | 0 | 1.939334   | 6.901161  | 1.010837  |
| 71 | 1  | 0 | 3.370657   | 6.241851  | 0.171356  |
| 72 | 53 | 0 | 4.785562   | 2.989295  | 0.368659  |

---

Complex **1•(12GA)<sub>2</sub>**; E(RM062X) = -3374.89466883 au

| Center<br>Number | Atomic<br>Number | Atomic<br>Type | Coordinates (Angstroms) |           |           |
|------------------|------------------|----------------|-------------------------|-----------|-----------|
|                  |                  |                | X                       | Y         | Z         |
| 1                | 7                | 0              | 1.628705                | 3.563964  | 0.034203  |
| 2                | 6                | 0              | 1.685518                | 2.246563  | -0.316284 |
| 3                | 6                | 0              | 3.002085                | 1.913166  | -0.513174 |
| 4                | 7                | 0              | 3.671162                | 3.057393  | -0.255804 |
| 5                | 7                | 0              | 2.823123                | 4.047314  | 0.071182  |
| 6                | 6                | 0              | 0.514889                | 1.374890  | -0.422211 |
| 7                | 6                | 0              | -0.768367               | 1.875820  | -0.223500 |
| 8                | 6                | 0              | -1.874347               | 1.030939  | -0.308793 |
| 9                | 6                | 0              | -1.696294               | -0.323291 | -0.585437 |
| 10               | 6                | 0              | -0.412170               | -0.827767 | -0.782872 |
| 11               | 6                | 0              | 0.686331                | 0.017471  | -0.700254 |
| 12               | 6                | 0              | -0.142645               | -2.280676 | -1.057751 |
| 13               | 7                | 0              | -1.190014               | -3.045768 | -1.388354 |
| 14               | 6                | 0              | -1.030475               | -4.466939 | -1.629107 |
| 15               | 6                | 0              | -3.229123               | 1.557179  | -0.108444 |
| 16               | 6                | 0              | -3.676707               | 2.857271  | -0.087440 |
| 17               | 7                | 0              | -5.013920               | 2.755486  | 0.111677  |
| 18               | 7                | 0              | -5.383764               | 1.480726  | 0.205416  |
| 19               | 7                | 0              | -4.320610               | 0.759185  | 0.072690  |
| 20               | 6                | 0              | -5.980451               | 3.797155  | 0.208312  |
| 21               | 6                | 0              | -5.611105               | 5.035699  | 0.717709  |
| 22               | 6                | 0              | -6.556540               | 6.048470  | 0.788923  |
| 23               | 6                | 0              | -7.872789               | 5.835755  | 0.371896  |
| 24               | 6                | 0              | -8.218562               | 4.574214  | -0.123011 |
| 25               | 6                | 0              | -7.282736               | 3.556277  | -0.213415 |
| 26               | 6                | 0              | -8.881475               | 6.919216  | 0.456700  |
| 27               | 6                | 0              | -8.545242               | 8.233994  | 0.123111  |
| 28               | 6                | 0              | -9.492022               | 9.247459  | 0.200504  |
| 29               | 6                | 0              | -10.788710              | 8.962279  | 0.613939  |
| 30               | 6                | 0              | -11.133287              | 7.657377  | 0.949278  |
| 31               | 6                | 0              | -10.187201              | 6.643537  | 0.871145  |
| 32               | 6                | 0              | 5.078372                | 3.242177  | -0.283013 |
| 33               | 6                | 0              | 5.899227                | 2.129436  | -0.131629 |
| 34               | 6                | 0              | 7.273730                | 2.279090  | -0.217212 |
| 35               | 6                | 0              | 7.845823                | 3.536543  | -0.431466 |
| 36               | 6                | 0              | 6.999062                | 4.643147  | -0.548925 |
| 37               | 6                | 0              | 5.619612                | 4.506020  | -0.483156 |
| 38               | 6                | 0              | 9.317113                | 3.680646  | -0.542924 |
| 39               | 6                | 0              | 9.974656                | 4.787530  | 0.000946  |
| 40               | 6                | 0              | 11.353098               | 4.918978  | -0.109446 |
| 41               | 6                | 0              | 12.098592               | 3.945002  | -0.765029 |
| 42               | 6                | 0              | 11.455375               | 2.837586  | -1.307933 |
| 43               | 6                | 0              | 10.076221               | 2.705895  | -1.198946 |
| 44               | 8                | 0              | 0.994224                | -2.748070 | -0.977396 |
| 45               | 1                | 0              | -2.570565               | -0.958962 | -0.644584 |
| 46               | 1                | 0              | -0.880492               | 2.927993  | 0.013604  |
| 47               | 1                | 0              | 1.677323                | -0.397705 | -0.852572 |
| 48               | 1                | 0              | -3.181571               | 3.800664  | -0.235958 |
| 49               | 1                | 0              | 3.484963                | 0.999382  | -0.818601 |
| 50               | 1                | 0              | -4.605353               | 5.198882  | 1.085321  |
| 51               | 1                | 0              | -6.277317               | 7.007378  | 1.209251  |
| 52               | 1                | 0              | -9.228513               | 4.398406  | -0.474222 |
| 53               | 1                | 0              | -7.541794               | 2.583582  | -0.609659 |
| 54               | 1                | 0              | -7.542685               | 8.456869  | -0.224795 |

|     |   |   |            |           |           |
|-----|---|---|------------|-----------|-----------|
| 55  | 1 | 0 | -9.218584  | 10.260258 | -0.070416 |
| 56  | 1 | 0 | -11.526768 | 9.752815  | 0.675722  |
| 57  | 1 | 0 | -12.139320 | 7.429274  | 1.280412  |
| 58  | 1 | 0 | -10.454167 | 5.632561  | 1.158269  |
| 59  | 1 | 0 | 5.465382   | 1.153792  | 0.055265  |
| 60  | 1 | 0 | 7.908163   | 1.405987  | -0.104744 |
| 61  | 1 | 0 | 7.424098   | 5.622457  | -0.736671 |
| 62  | 1 | 0 | 4.957858   | 5.354064  | -0.598497 |
| 63  | 1 | 0 | 9.403044   | 5.537614  | 0.536068  |
| 64  | 1 | 0 | 11.846773  | 5.779983  | 0.325388  |
| 65  | 1 | 0 | 13.173578  | 4.048357  | -0.852179 |
| 66  | 1 | 0 | 12.026187  | 2.076361  | -1.826812 |
| 67  | 1 | 0 | 9.580350   | 1.845783  | -1.637378 |
| 68  | 1 | 0 | -2.113693  | -2.650458 | -1.507934 |
| 69  | 1 | 0 | -0.352373  | -4.888365 | -0.887527 |
| 70  | 1 | 0 | -2.008244  | -4.939319 | -1.546926 |
| 71  | 1 | 0 | -0.614749  | -4.658964 | -2.621484 |
| 72  | 1 | 0 | 2.605826   | -2.752451 | -0.475484 |
| 73  | 8 | 0 | 3.513144   | -2.981547 | -0.155714 |
| 74  | 6 | 0 | 4.369142   | -2.009701 | -0.400236 |
| 75  | 8 | 0 | 4.068459   | -0.960431 | -0.930173 |
| 76  | 6 | 0 | 5.759010   | -2.311986 | 0.055362  |
| 77  | 6 | 0 | 6.028142   | -3.461731 | 0.799744  |
| 78  | 6 | 0 | 7.325584   | -3.703076 | 1.228402  |
| 79  | 6 | 0 | 8.356814   | -2.788583 | 0.936367  |
| 80  | 6 | 0 | 8.064017   | -1.634991 | 0.202394  |
| 81  | 6 | 0 | 6.766533   | -1.413555 | -0.255303 |
| 82  | 1 | 0 | 5.220888   | -4.146361 | 1.012921  |
| 83  | 8 | 0 | 7.710670   | -4.807897 | 1.916021  |
| 84  | 8 | 0 | 9.647100   | -3.044660 | 1.286023  |
| 85  | 8 | 0 | 9.006548   | -0.711635 | -0.135412 |
| 86  | 1 | 0 | 6.557580   | -0.538674 | -0.857306 |
| 87  | 6 | 0 | 6.723341   | -5.786135 | 2.179974  |
| 88  | 1 | 0 | 7.231924   | -6.589501 | 2.707638  |
| 89  | 1 | 0 | 5.924492   | -5.381889 | 2.808915  |
| 90  | 1 | 0 | 6.296110   | -6.172135 | 1.249899  |
| 91  | 6 | 0 | 9.924295   | -3.131322 | 2.682467  |
| 92  | 1 | 0 | 11.004976  | -3.037609 | 2.782296  |
| 93  | 1 | 0 | 9.435785   | -2.313694 | 3.221873  |
| 94  | 1 | 0 | 9.593288   | -4.086110 | 3.087803  |
| 95  | 6 | 0 | 9.952700   | -0.320214 | 0.858176  |
| 96  | 1 | 0 | 10.255735  | 0.695537  | 0.602958  |
| 97  | 1 | 0 | 9.488798   | -0.319227 | 1.849328  |
| 98  | 1 | 0 | 10.818147  | -0.981036 | 0.857075  |
| 99  | 1 | 0 | -4.819383  | -0.945109 | 0.228968  |
| 100 | 8 | 0 | -5.307448  | -1.797494 | 0.379383  |
| 101 | 6 | 0 | -4.938147  | -2.717980 | -0.489241 |
| 102 | 8 | 0 | -4.052906  | -2.555302 | -1.306055 |
| 103 | 6 | 0 | -5.708667  | -3.988230 | -0.377268 |
| 104 | 6 | 0 | -6.655657  | -4.158875 | 0.635255  |
| 105 | 6 | 0 | -7.361148  | -5.351080 | 0.705313  |
| 106 | 6 | 0 | -7.122274  | -6.380285 | -0.227886 |
| 107 | 6 | 0 | -6.163595  | -6.192609 | -1.228941 |
| 108 | 6 | 0 | -5.464045  | -4.988577 | -1.301418 |
| 109 | 1 | 0 | -6.828776  | -3.352463 | 1.332019  |
| 110 | 8 | 0 | -8.331787  | -5.611750 | 1.617448  |
| 111 | 8 | 0 | -7.870351  | -7.518532 | -0.221685 |
| 112 | 8 | 0 | -5.901839  | -7.104683 | -2.198562 |
| 113 | 1 | 0 | -4.737595  | -4.846860 | -2.090625 |
| 114 | 6 | 0 | -5.836441  | -8.482415 | -1.852145 |

|     |   |   |           |           |           |
|-----|---|---|-----------|-----------|-----------|
| 115 | 1 | 0 | -5.204172 | -8.947557 | -2.607196 |
| 116 | 1 | 0 | -5.374805 | -8.612592 | -0.868379 |
| 117 | 1 | 0 | -6.824358 | -8.941054 | -1.857972 |
| 118 | 6 | 0 | -7.732412 | -8.357589 | 0.922977  |
| 119 | 1 | 0 | -8.228720 | -9.293795 | 0.671786  |
| 120 | 1 | 0 | -6.675040 | -8.549174 | 1.132216  |
| 121 | 1 | 0 | -8.203999 | -7.909266 | 1.796279  |
| 122 | 6 | 0 | -8.662400 | -4.580451 | 2.527461  |
| 123 | 1 | 0 | -9.465504 | -4.973491 | 3.146255  |
| 124 | 1 | 0 | -7.807148 | -4.320392 | 3.158275  |
| 125 | 1 | 0 | -9.010380 | -3.688228 | 1.998759  |

---

Complex **1•12GA-1**; E(RM062X) = -2610.57328078 au

| Center<br>Number | Atomic<br>Number | Atomic<br>Type | Coordinates (Angstroms) |           |           |
|------------------|------------------|----------------|-------------------------|-----------|-----------|
|                  |                  |                | X                       | Y         | Z         |
| 1                | 7                | 0              | 4.211894                | 1.292927  | 0.261557  |
| 2                | 6                | 0              | 3.868283                | 0.002758  | -0.021054 |
| 3                | 6                | 0              | 5.027721                | -0.732766 | -0.088665 |
| 4                | 7                | 0              | 6.009422                | 0.166704  | 0.162213  |
| 5                | 7                | 0              | 5.490111                | 1.386205  | 0.370762  |
| 6                | 6                | 0              | 2.473662                | -0.410099 | -0.209514 |
| 7                | 6                | 0              | 1.452059                | 0.527706  | -0.066018 |
| 8                | 6                | 0              | 0.123836                | 0.150691  | -0.245310 |
| 9                | 6                | 0              | -0.191712               | -1.170786 | -0.562468 |
| 10               | 6                | 0              | 0.824632                | -2.111583 | -0.701255 |
| 11               | 6                | 0              | 2.149160                | -1.727823 | -0.523644 |
| 12               | 6                | 0              | 0.586024                | -3.567946 | -1.028482 |
| 13               | 7                | 0              | -0.687951               | -3.935560 | -1.273755 |
| 14               | 6                | 0              | -1.001941               | -5.316122 | -1.581898 |
| 15               | 6                | 0              | -0.951010               | 1.140648  | -0.113567 |
| 16               | 6                | 0              | -0.902965               | 2.509970  | -0.225508 |
| 17               | 7                | 0              | -2.184504               | 2.913391  | -0.042922 |
| 18               | 7                | 0              | -2.984107               | 1.869940  | 0.166048  |
| 19               | 7                | 0              | -2.252458               | 0.806303  | 0.122730  |
| 20               | 6                | 0              | -2.715942               | 4.234492  | -0.071490 |
| 21               | 6                | 0              | -1.912083               | 5.311244  | 0.281914  |
| 22               | 6                | 0              | -2.437483               | 6.594475  | 0.232132  |
| 23               | 6                | 0              | -3.762446               | 6.815916  | -0.150826 |
| 24               | 6                | 0              | -4.551680               | 5.711549  | -0.487789 |
| 25               | 6                | 0              | -4.037561               | 4.425150  | -0.458032 |
| 26               | 6                | 0              | -4.320646               | 8.189006  | -0.192185 |
| 27               | 6                | 0              | -3.566067               | 9.250267  | -0.698945 |
| 28               | 6                | 0              | -4.090207               | 10.536123 | -0.735963 |
| 29               | 6                | 0              | -5.375631               | 10.780723 | -0.265490 |
| 30               | 6                | 0              | -6.134491               | 9.731543  | 0.241642  |
| 31               | 6                | 0              | -5.611494               | 8.445284  | 0.277120  |
| 32               | 6                | 0              | 7.414193                | -0.039419 | 0.218077  |
| 33               | 6                | 0              | 7.920873                | -1.284062 | 0.573209  |
| 34               | 6                | 0              | 9.294500                | -1.475678 | 0.606460  |
| 35               | 6                | 0              | 10.175414               | -0.434495 | 0.304528  |
| 36               | 6                | 0              | 9.638829                | 0.811526  | -0.034270 |
| 37               | 6                | 0              | 8.268997                | 1.014840  | -0.086001 |
| 38               | 6                | 0              | 11.642529               | -0.645439 | 0.347693  |
| 39               | 6                | 0              | 12.487718               | 0.331782  | 0.880617  |
| 40               | 6                | 0              | 13.861800               | 0.133013  | 0.921613  |
| 41               | 6                | 0              | 14.413025               | -1.045368 | 0.430018  |
| 42               | 6                | 0              | 13.581153               | -2.024201 | -0.102802 |
| 43               | 6                | 0              | 12.207025               | -1.825774 | -0.143594 |
| 44               | 8                | 0              | 1.516969                | -4.356088 | -1.052280 |
| 45               | 1                | 0              | -1.233012               | -1.428163 | -0.712602 |
| 46               | 1                | 0              | 1.714005                | 1.545182  | 0.200990  |
| 47               | 1                | 0              | 2.908861                | -2.492593 | -0.636660 |
| 48               | 1                | 0              | -0.103854               | 3.190909  | -0.459430 |
| 49               | 1                | 0              | 5.227595                | -1.765596 | -0.313803 |
| 50               | 1                | 0              | -0.897090               | 5.149389  | 0.623546  |
| 51               | 1                | 0              | -1.820471               | 7.433862  | 0.530522  |
| 52               | 1                | 0              | -5.574498               | 5.866554  | -0.810477 |
| 53               | 1                | 0              | -4.639469               | 3.569554  | -0.733420 |

|    |   |   |           |           |           |
|----|---|---|-----------|-----------|-----------|
| 54 | 1 | 0 | -2.572739 | 9.060545  | -1.090505 |
| 55 | 1 | 0 | -3.496476 | 11.346987 | -1.140585 |
| 56 | 1 | 0 | -5.783762 | 11.783673 | -0.294445 |
| 57 | 1 | 0 | -7.133549 | 9.915679  | 0.618239  |
| 58 | 1 | 0 | -6.197433 | 7.635157  | 0.696749  |
| 59 | 1 | 0 | 7.251767  | -2.088491 | 0.852531  |
| 60 | 1 | 0 | 9.688724  | -2.438886 | 0.908532  |
| 61 | 1 | 0 | 10.305284 | 1.625721  | -0.294017 |
| 62 | 1 | 0 | 7.849190  | 1.972787  | -0.361618 |
| 63 | 1 | 0 | 12.060936 | 1.241120  | 1.288941  |
| 64 | 1 | 0 | 14.503229 | 0.896446  | 1.345441  |
| 65 | 1 | 0 | 15.484667 | -1.200120 | 0.461692  |
| 66 | 1 | 0 | 14.003398 | -2.941286 | -0.496173 |
| 67 | 1 | 0 | 11.564816 | -2.580528 | -0.583679 |
| 68 | 1 | 0 | -1.440006 | -3.262143 | -1.309336 |
| 69 | 1 | 0 | -0.404502 | -5.971692 | -0.948657 |
| 70 | 1 | 0 | -2.061134 | -5.484339 | -1.390848 |
| 71 | 1 | 0 | -0.780476 | -5.557625 | -2.625486 |
| 72 | 1 | 0 | -3.308379 | -0.604099 | 0.425931  |
| 73 | 8 | 0 | -4.043445 | -1.239913 | 0.632093  |
| 74 | 6 | 0 | -4.036975 | -2.247681 | -0.218569 |
| 75 | 8 | 0 | -3.195393 | -2.390216 | -1.083462 |
| 76 | 6 | 0 | -5.160828 | -3.206262 | -0.024823 |
| 77 | 6 | 0 | -6.070783 | -3.041710 | 1.021930  |
| 78 | 6 | 0 | -7.107146 | -3.953022 | 1.165062  |
| 79 | 6 | 0 | -7.234048 | -5.037362 | 0.273781  |
| 80 | 6 | 0 | -6.306415 | -5.189608 | -0.761359 |
| 81 | 6 | 0 | -5.275510 | -4.263695 | -0.910232 |
| 82 | 1 | 0 | -5.956557 | -2.199421 | 1.687868  |
| 83 | 8 | 0 | -8.073406 | -3.868403 | 2.114959  |
| 84 | 8 | 0 | -8.291246 | -5.892290 | 0.353528  |
| 85 | 8 | 0 | -6.379010 | -6.177317 | -1.689523 |
| 86 | 1 | 0 | -4.572854 | -4.381519 | -1.724246 |
| 87 | 6 | 0 | -6.681957 | -7.498308 | -1.257869 |
| 88 | 1 | 0 | -6.250475 | -8.162516 | -2.005377 |
| 89 | 1 | 0 | -6.219428 | -7.702418 | -0.287071 |
| 90 | 1 | 0 | -7.757472 | -7.658522 | -1.193230 |
| 91 | 6 | 0 | -8.375081 | -6.683315 | 1.536995  |
| 92 | 1 | 0 | -9.133935 | -7.439580 | 1.341474  |
| 93 | 1 | 0 | -7.416178 | -7.171552 | 1.738502  |
| 94 | 1 | 0 | -8.665393 | -6.077419 | 2.394130  |
| 95 | 6 | 0 | -8.024430 | -2.762288 | 2.994991  |
| 96 | 1 | 0 | -8.883787 | -2.865164 | 3.653367  |
| 97 | 1 | 0 | -7.105328 | -2.769239 | 3.588507  |
| 98 | 1 | 0 | -8.096229 | -1.819533 | 2.444777  |

---



Complex **1•12GA-r**; E(RM062X) = -2610.57986701 au

| Center<br>Number | Atomic<br>Number | Atomic<br>Type | Coordinates (Angstroms) |           |           |
|------------------|------------------|----------------|-------------------------|-----------|-----------|
|                  |                  |                | X                       | Y         | Z         |
| 1                | 7                | 0              | -0.675096               | 1.929423  | -0.375185 |
| 2                | 6                | 0              | -0.212403               | 0.705107  | -0.759187 |
| 3                | 6                | 0              | 1.145897                | 0.797176  | -0.934300 |
| 4                | 7                | 0              | 1.427783                | 2.082641  | -0.631122 |
| 5                | 7                | 0              | 0.312581                | 2.753827  | -0.297750 |
| 6                | 6                | 0              | -1.060496               | -0.478528 | -0.903971 |
| 7                | 6                | 0              | -2.436974               | -0.396993 | -0.710203 |
| 8                | 6                | 0              | -3.237745               | -1.533419 | -0.815254 |
| 9                | 6                | 0              | -2.652650               | -2.761922 | -1.122790 |
| 10               | 6                | 0              | -1.277184               | -2.842511 | -1.330848 |
| 11               | 6                | 0              | -0.482189               | -1.709645 | -1.213726 |
| 12               | 6                | 0              | -0.587691               | -4.130338 | -1.659811 |
| 13               | 7                | 0              | -1.338988               | -5.084731 | -2.244041 |
| 14               | 6                | 0              | -0.761359               | -6.358573 | -2.632663 |
| 15               | 6                | 0              | -4.685874               | -1.459354 | -0.594169 |
| 16               | 6                | 0              | -5.483600               | -0.385778 | -0.276117 |
| 17               | 7                | 0              | -6.731901               | -0.906966 | -0.201117 |
| 18               | 7                | 0              | -6.709234               | -2.223488 | -0.459660 |
| 19               | 7                | 0              | -5.490018               | -2.556896 | -0.696014 |
| 20               | 6                | 0              | -7.956927               | -0.250328 | 0.096615  |
| 21               | 6                | 0              | -7.955429               | 0.912071  | 0.859266  |
| 22               | 6                | 0              | -9.156562               | 1.552095  | 1.128266  |
| 23               | 6                | 0              | -10.367992              | 1.038082  | 0.659563  |
| 24               | 6                | 0              | -10.341590              | -0.139734 | -0.093955 |
| 25               | 6                | 0              | -9.148849               | -0.782644 | -0.383968 |
| 26               | 6                | 0              | -11.650473              | 1.717961  | 0.962058  |
| 27               | 6                | 0              | -11.748673              | 3.111270  | 0.917168  |
| 28               | 6                | 0              | -12.950887              | 3.745752  | 1.202723  |
| 29               | 6                | 0              | -14.074190              | 2.997371  | 1.538042  |
| 30               | 6                | 0              | -13.987282              | 1.610261  | 1.586260  |
| 31               | 6                | 0              | -12.785445              | 0.975603  | 1.300395  |
| 32               | 6                | 0              | 2.711456                | 2.688189  | -0.607697 |
| 33               | 6                | 0              | 3.826664                | 1.876948  | -0.430288 |
| 34               | 6                | 0              | 5.092075                | 2.439989  | -0.460002 |
| 35               | 6                | 0              | 5.259330                | 3.815744  | -0.643058 |
| 36               | 6                | 0              | 4.119763                | 4.612809  | -0.790295 |
| 37               | 6                | 0              | 2.846891                | 4.059721  | -0.781239 |
| 38               | 6                | 0              | 6.619417                | 4.404903  | -0.683218 |
| 39               | 6                | 0              | 6.885568                | 5.640456  | -0.086619 |
| 40               | 6                | 0              | 8.162711                | 6.185825  | -0.123296 |
| 41               | 6                | 0              | 9.196476                | 5.504435  | -0.756893 |
| 42               | 6                | 0              | 8.943702                | 4.273614  | -1.353686 |
| 43               | 6                | 0              | 7.666363                | 3.727997  | -1.317922 |
| 44               | 8                | 0              | 0.601932                | -4.317623 | -1.420486 |
| 45               | 1                | 0              | -3.289378               | -3.638291 | -1.155019 |
| 46               | 1                | 0              | -2.864120               | 0.569052  | -0.465541 |
| 47               | 1                | 0              | 0.588243                | -1.797839 | -1.369790 |
| 48               | 1                | 0              | -5.280300               | 0.660638  | -0.132591 |
| 49               | 1                | 0              | 1.891668                | 0.085322  | -1.249346 |
| 50               | 1                | 0              | -7.029749               | 1.298850  | 1.267494  |
| 51               | 1                | 0              | -9.157101               | 2.443811  | 1.744230  |
| 52               | 1                | 0              | -11.268618              | -0.541153 | -0.486712 |
| 53               | 1                | 0              | -9.124319               | -1.685940 | -0.978194 |

|    |   |   |            |           |           |
|----|---|---|------------|-----------|-----------|
| 54 | 1 | 0 | -10.882659 | 3.698083  | 0.631299  |
| 55 | 1 | 0 | -13.012777 | 4.826442  | 1.154978  |
| 56 | 1 | 0 | -15.011584 | 3.492707  | 1.760106  |
| 57 | 1 | 0 | -14.855695 | 1.020803  | 1.855608  |
| 58 | 1 | 0 | -12.716277 | -0.104634 | 1.365217  |
| 59 | 1 | 0 | 3.705788   | 0.813515  | -0.260741 |
| 60 | 1 | 0 | 5.955528   | 1.797379  | -0.322808 |
| 61 | 1 | 0 | 4.231819   | 5.678217  | -0.955374 |
| 62 | 1 | 0 | 1.962428   | 4.667565  | -0.918713 |
| 63 | 1 | 0 | 6.089948   | 6.164067  | 0.431913  |
| 64 | 1 | 0 | 8.352353   | 7.141293  | 0.351411  |
| 65 | 1 | 0 | 10.192271  | 5.929901  | -0.786722 |
| 66 | 1 | 0 | 9.741238   | 3.739662  | -1.857127 |
| 67 | 1 | 0 | 7.472896   | 2.774880  | -1.799198 |
| 68 | 1 | 0 | -2.257058  | -4.837739 | -2.575046 |
| 69 | 1 | 0 | -0.086481  | -6.692601 | -1.846570 |
| 70 | 1 | 0 | -1.560027  | -7.087059 | -2.760995 |
| 71 | 1 | 0 | -0.191991  | -6.273751 | -3.561740 |
| 72 | 1 | 0 | 2.006957   | -3.729723 | -0.635349 |
| 73 | 8 | 0 | 2.861542   | -3.622294 | -0.152558 |
| 74 | 6 | 0 | 3.466746   | -2.498736 | -0.488679 |
| 75 | 8 | 0 | 3.003448   | -1.687589 | -1.263308 |
| 76 | 6 | 0 | 4.780294   | -2.305847 | 0.194259  |
| 77 | 6 | 0 | 5.182958   | -3.169298 | 1.214896  |
| 78 | 6 | 0 | 6.397755   | -2.949063 | 1.848153  |
| 79 | 6 | 0 | 7.209854   | -1.859020 | 1.477951  |
| 80 | 6 | 0 | 6.782132   | -0.995319 | 0.465219  |
| 81 | 6 | 0 | 5.574910   | -1.237417 | -0.189015 |
| 82 | 1 | 0 | 4.544700   | -3.998785 | 1.480386  |
| 83 | 8 | 0 | 6.907893   | -3.742282 | 2.823404  |
| 84 | 8 | 0 | 8.436622   | -1.674079 | 2.035408  |
| 85 | 8 | 0 | 7.511678   | 0.071438  | 0.039424  |
| 86 | 1 | 0 | 5.270658   | -0.585730 | -0.998300 |
| 87 | 6 | 0 | 6.146423   | -4.870780 | 3.208287  |
| 88 | 1 | 0 | 6.722021   | -5.370012 | 3.984027  |
| 89 | 1 | 0 | 5.173279   | -4.571689 | 3.609103  |
| 90 | 1 | 0 | 6.000550   | -5.552401 | 2.365261  |
| 91 | 6 | 0 | 8.474993   | -1.433779 | 3.441050  |
| 92 | 1 | 0 | 9.413531   | -0.915249 | 3.635203  |
| 93 | 1 | 0 | 7.637421   | -0.798652 | 3.745464  |
| 94 | 1 | 0 | 8.443353   | -2.369977 | 3.995844  |
| 95 | 6 | 0 | 8.179749   | 0.872271  | 1.014194  |
| 96 | 1 | 0 | 8.258044   | 1.870168  | 0.581835  |
| 97 | 1 | 0 | 7.593296   | 0.923928  | 1.936672  |
| 98 | 1 | 0 | 9.171353   | 0.477984  | 1.229991  |

---
